# Supplementary material for: A novel Fer/FerT targeting compound selectively evokes metabolic stress and necrotic death in malignant cells
Source: PubMed Central journal article supplement (PMC5643328; doi:10.1038/s41467-017-00832-w), 2017-10-16
Supplement: 41467_2017_832_MOESM1_ESM.pdf [file 41467_2017_832_MOESM1_ESM.pdf]

A.

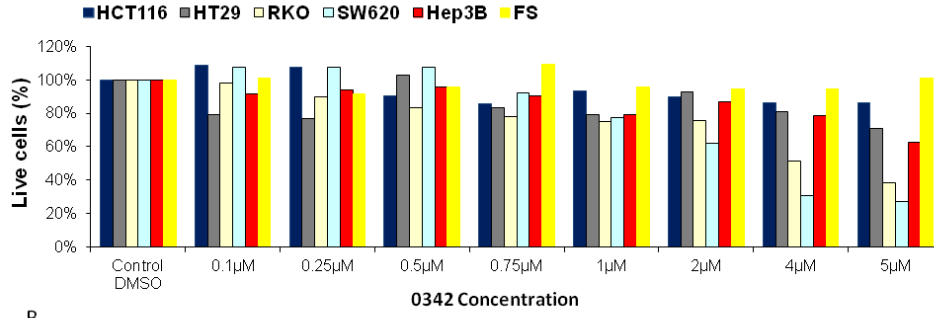

B.

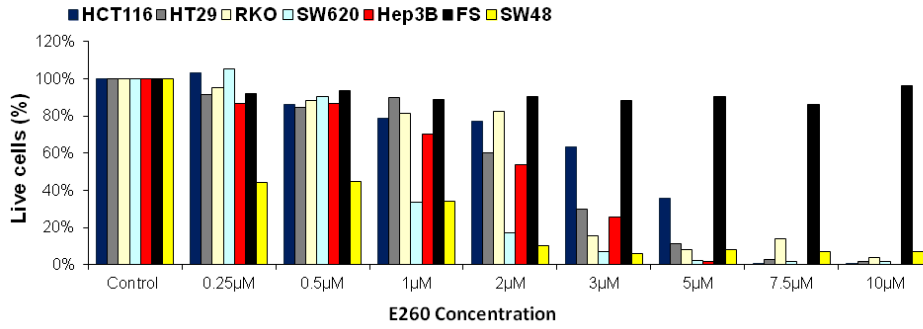

C.

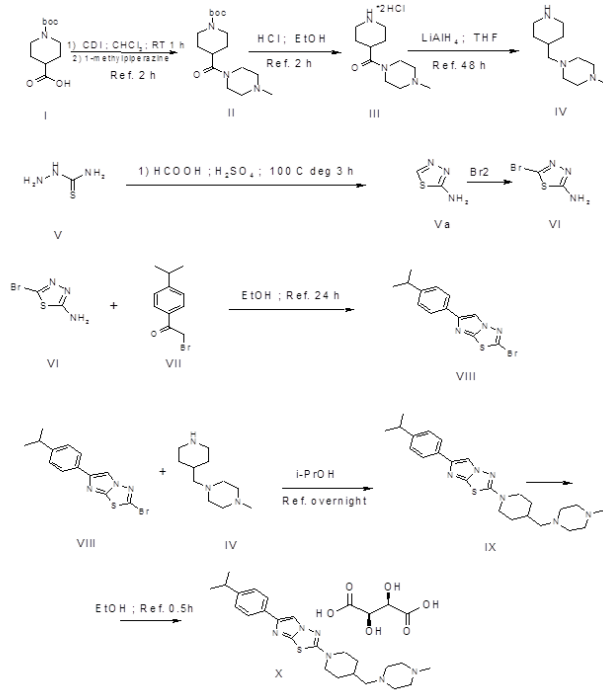

D.

Z522-0260B

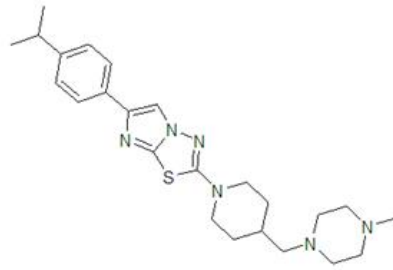

OK(0)

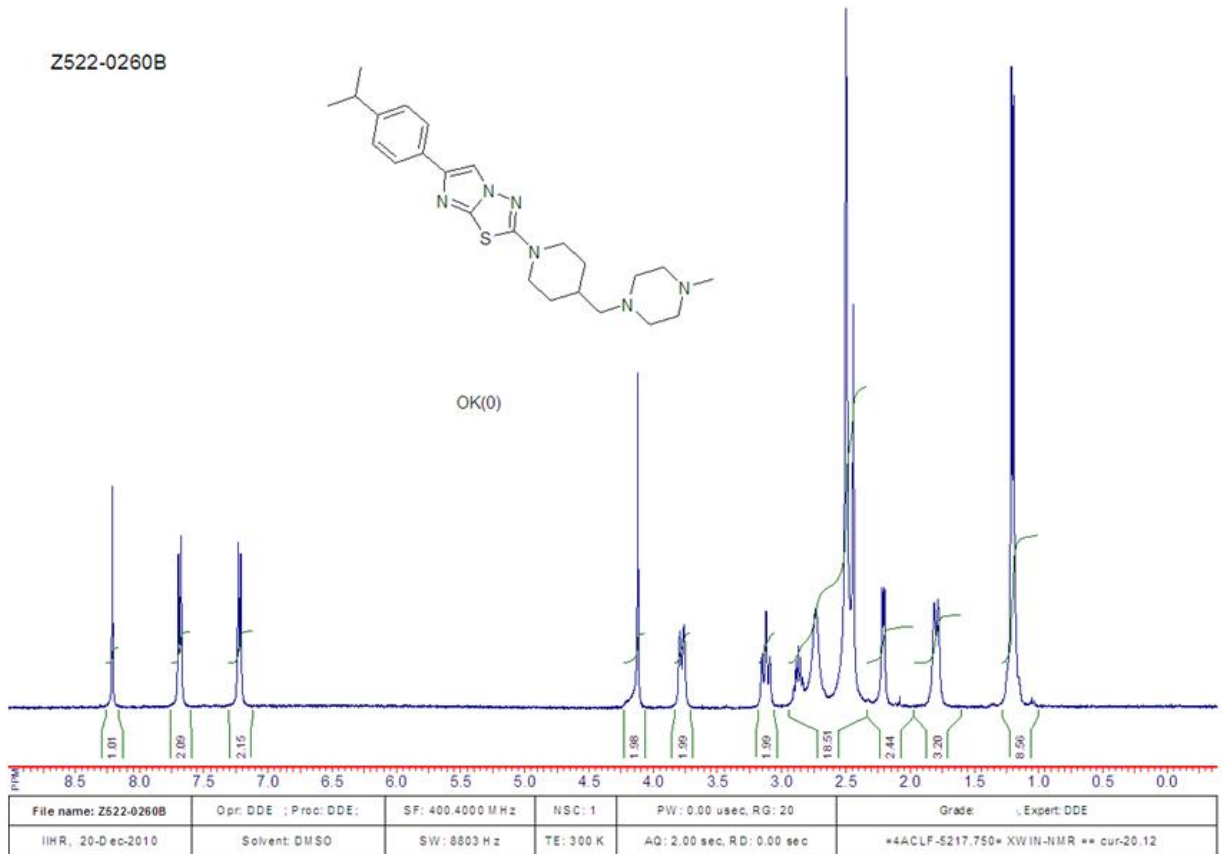

F.

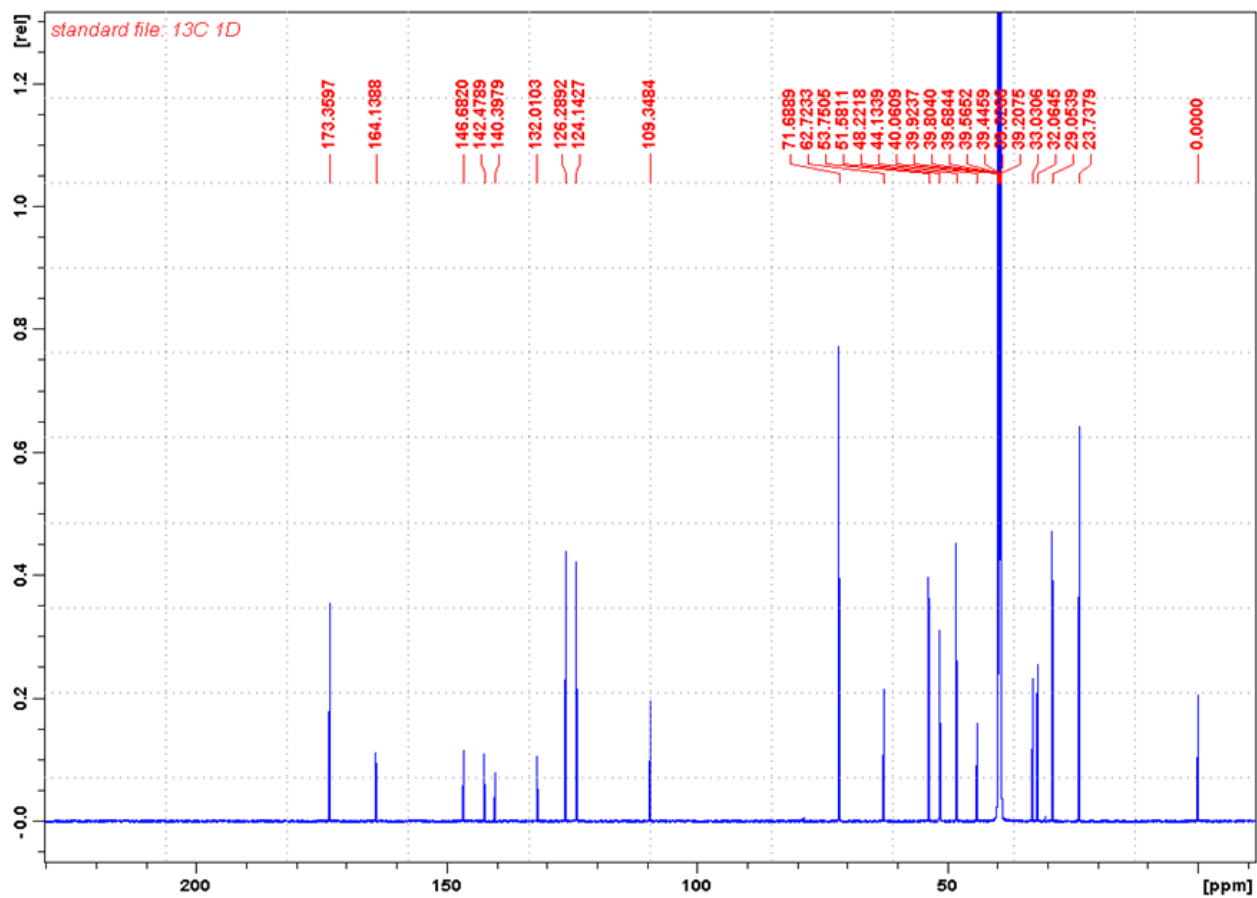

F.

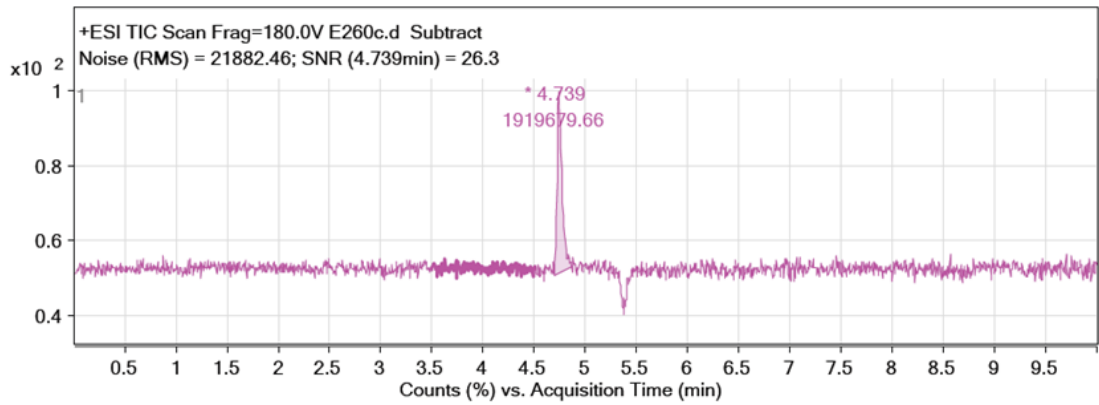

G.

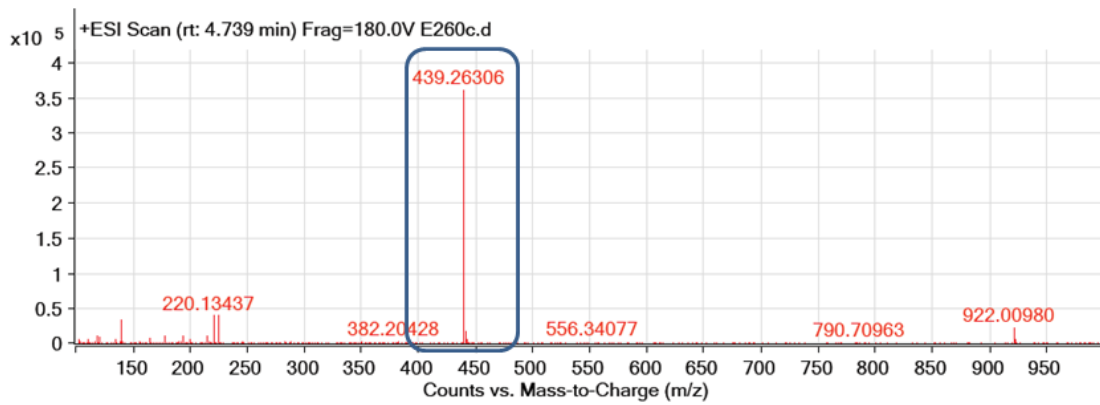

H.

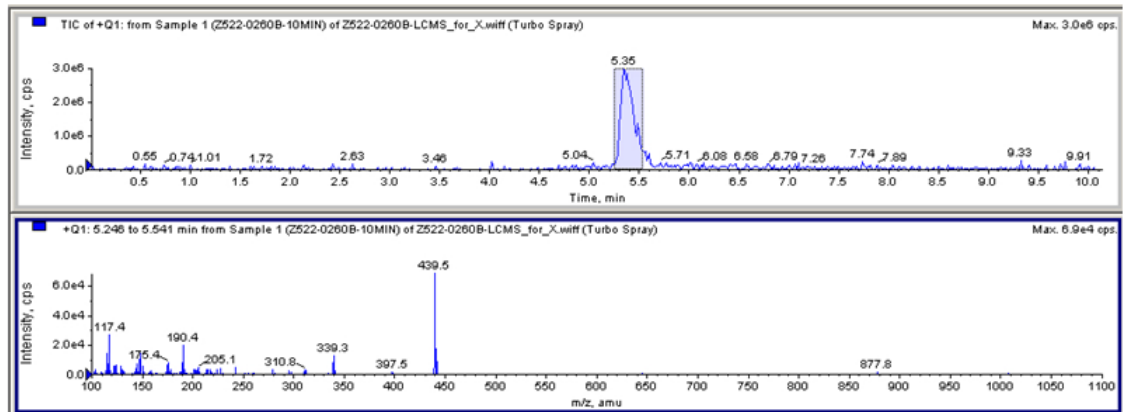

1.

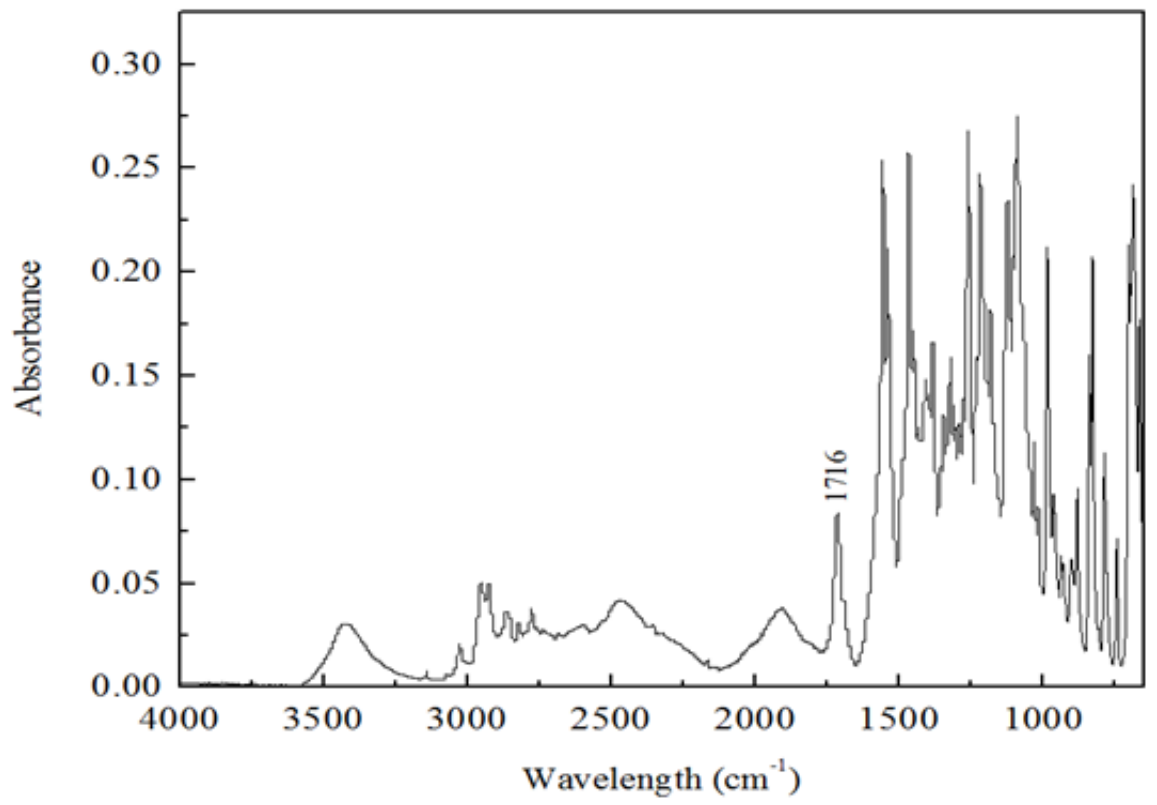

**Supplementary figure 1. Cell-viability based XTT HTS system for optimization of the Fer inhibitor E260 and its synthesis process.** XTT based robotic HTS analysis depicting the viability of cells incubated for 96h with ascending concentrations of (A) 0342, or (B) E260, dissolved in DMSO (Not formulated in Cremophor EL ®); n=2. (C) The complete synthesis scheme of the Fer inhibitor E260. (D) <sup>1</sup>H-NMR and (E) <sup>13</sup>C-NMR spectras of the synthesized E260 compound. For D Integral of peaks reflects number of protons. Also this spectrum contains signal of tartrate. Confirming a purity of >95%. (F) UPLC analysis of the compound E260 with a retention time of 4.73 minutes and purity of >99%. (G) HRMS analysis of the compound E260 confirms a molecular weight of 439.263 Dalton as calculated (Boxed with blue Square). Second peak at 220.136 depicts E260 which was charged with two protons. (H) LCMS of the compound E260 with a retention time of 5.35 minutes, molecular weight of 439.5 Dalton and purity of >95%. (I) FTIR spectrum of E260-tartrate. The peak at 1716 cm<sup>-1</sup> corresponds to the carbonyl of the tartrate salt.

A.

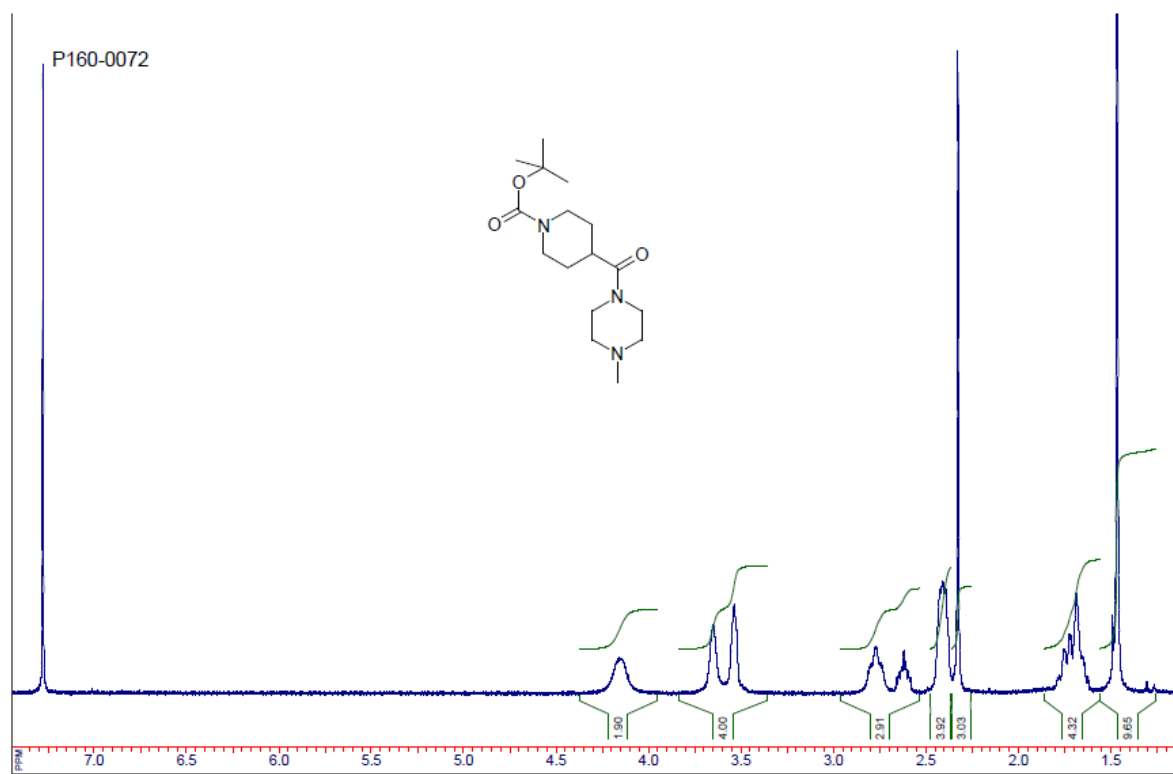

B.

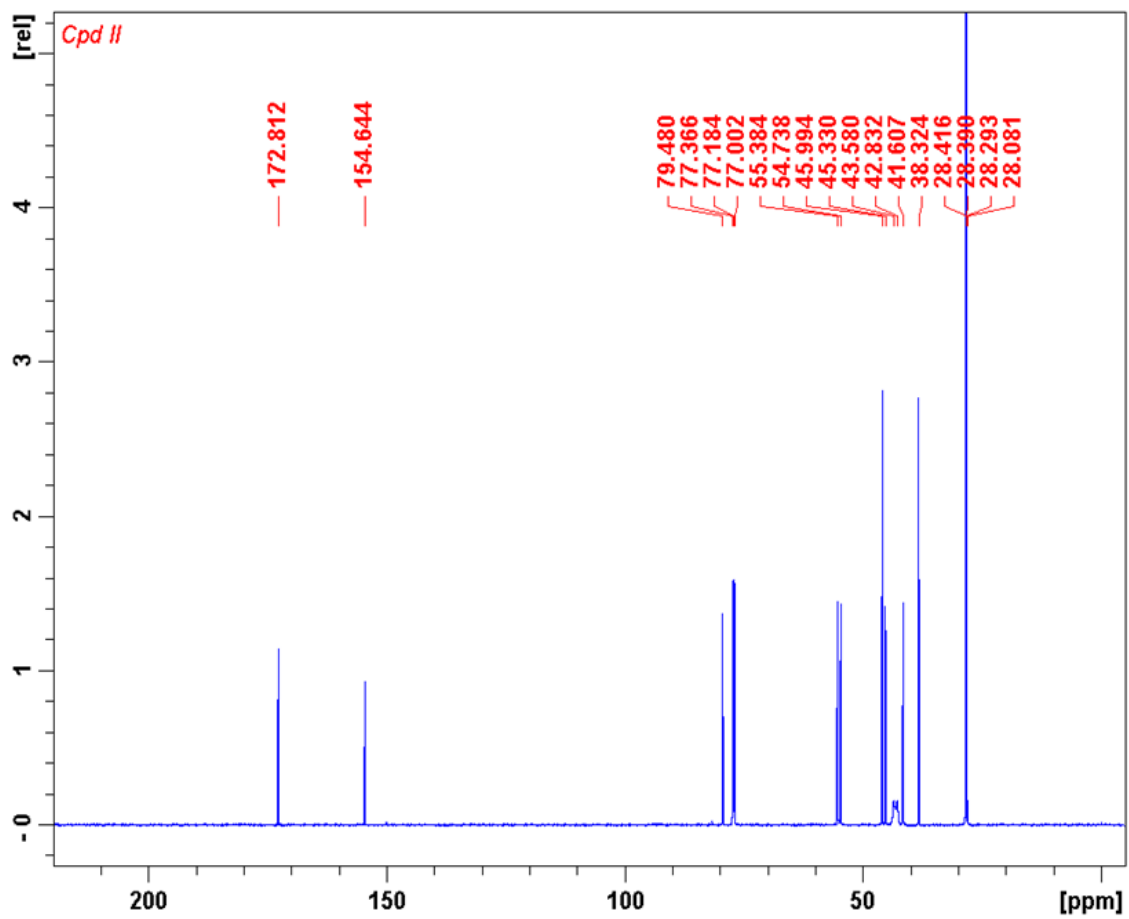



C.

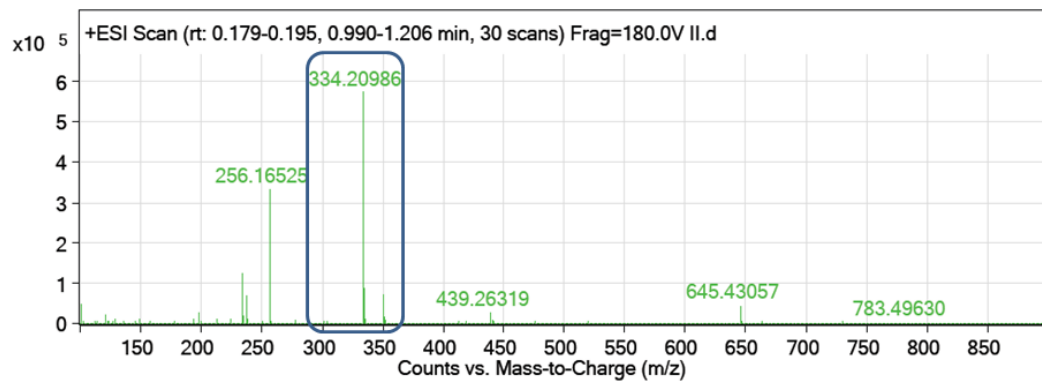

D.

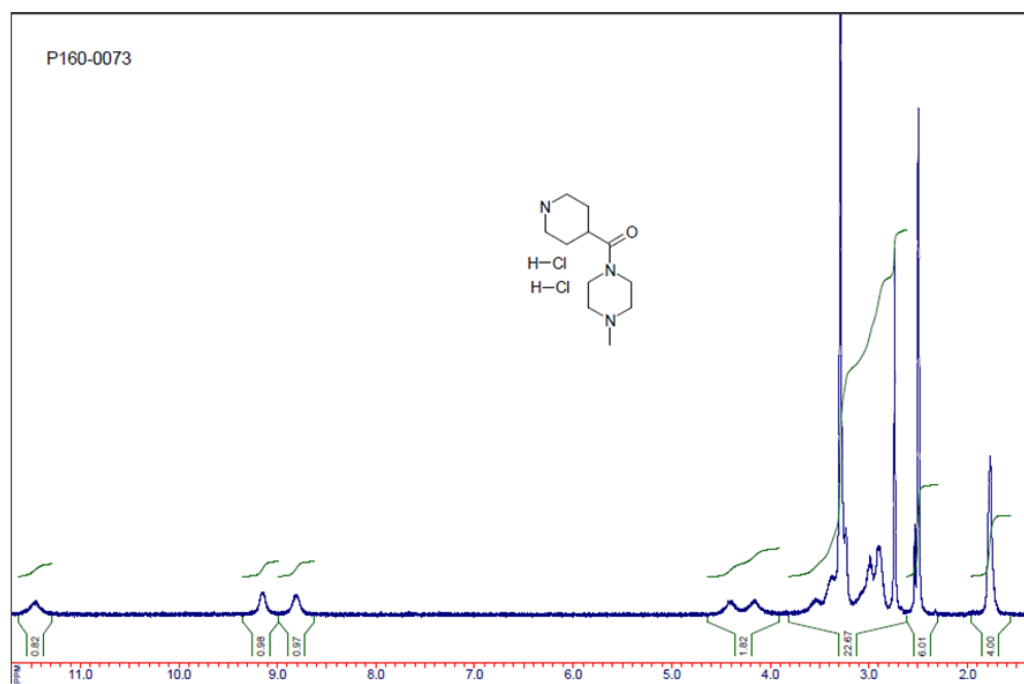

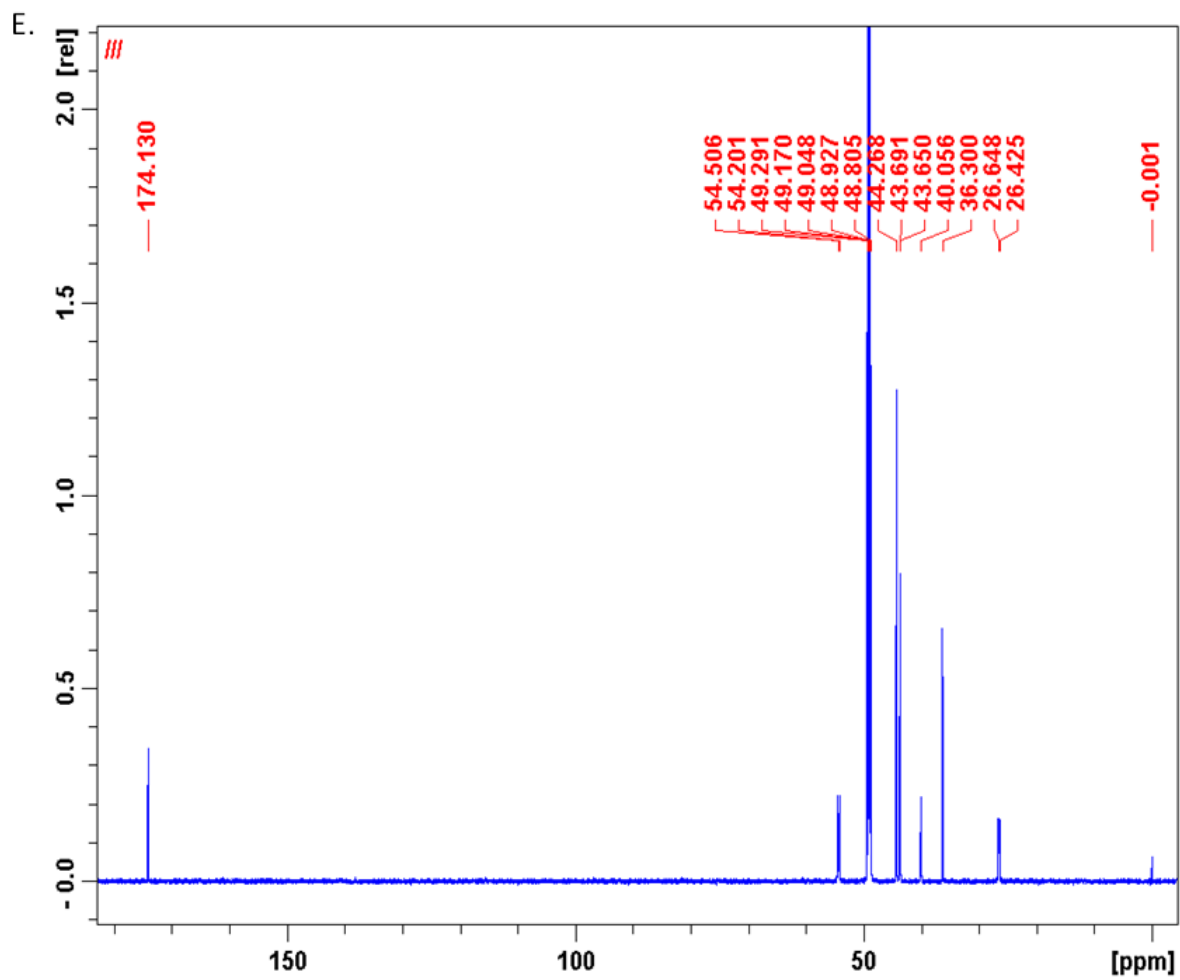

F.

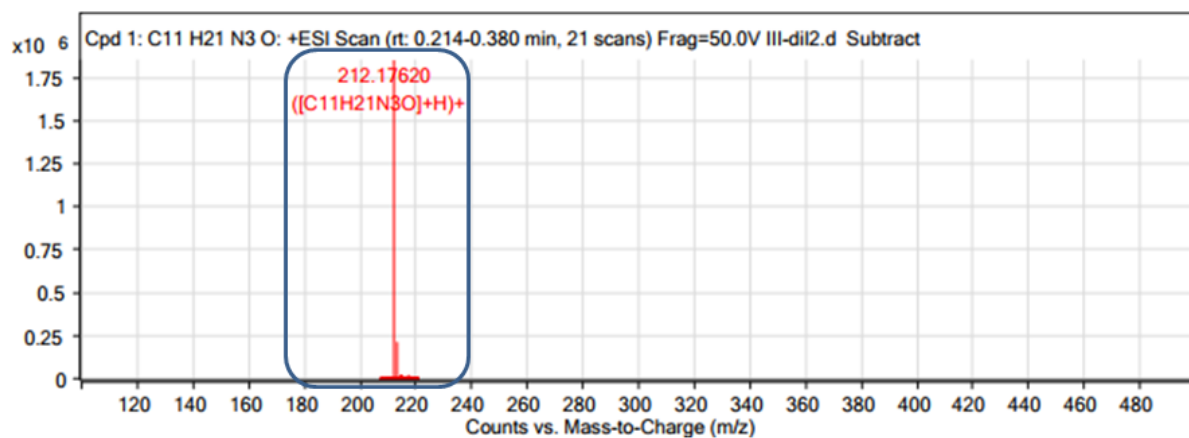

G.

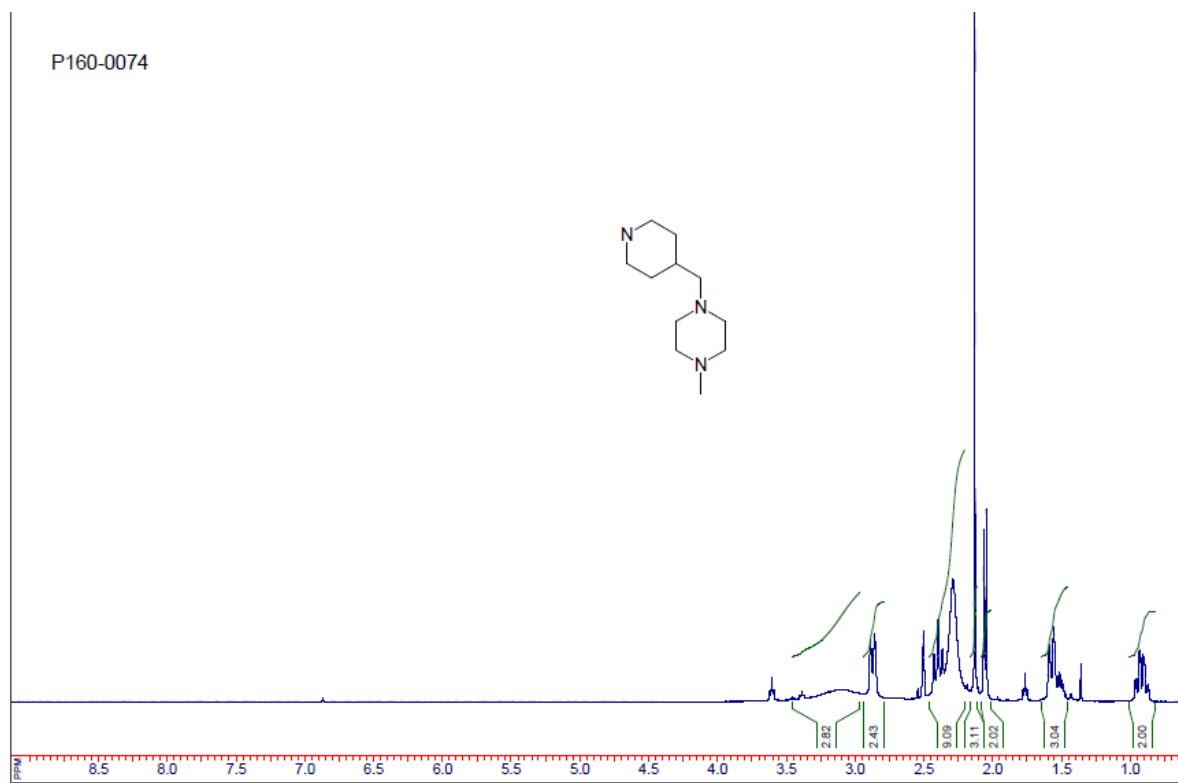

H.

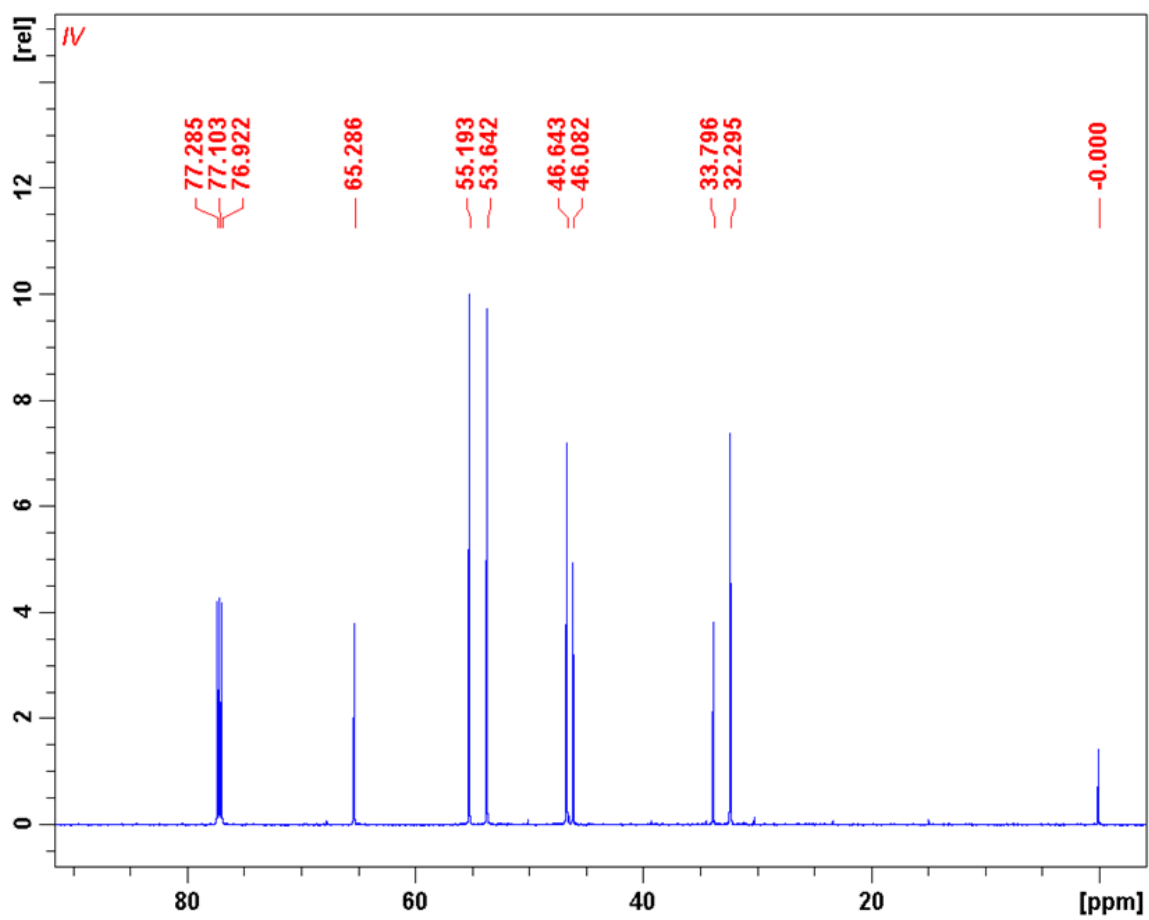

I.

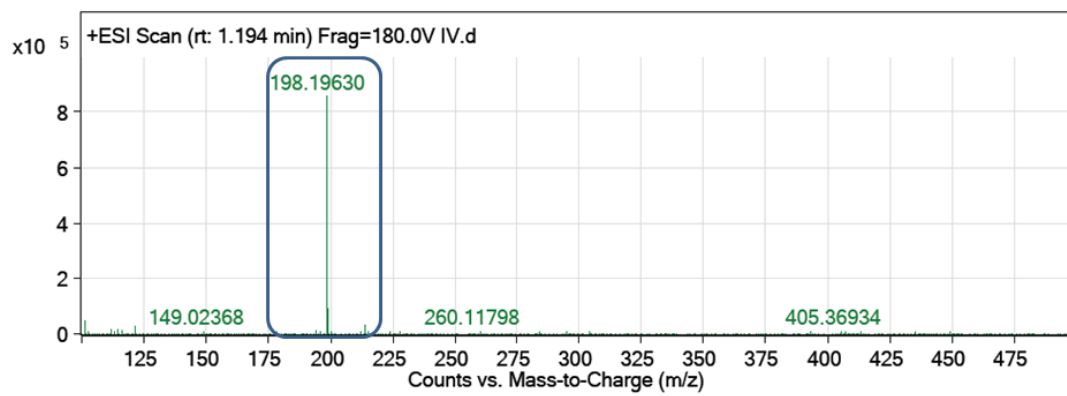

J.

P160-0075

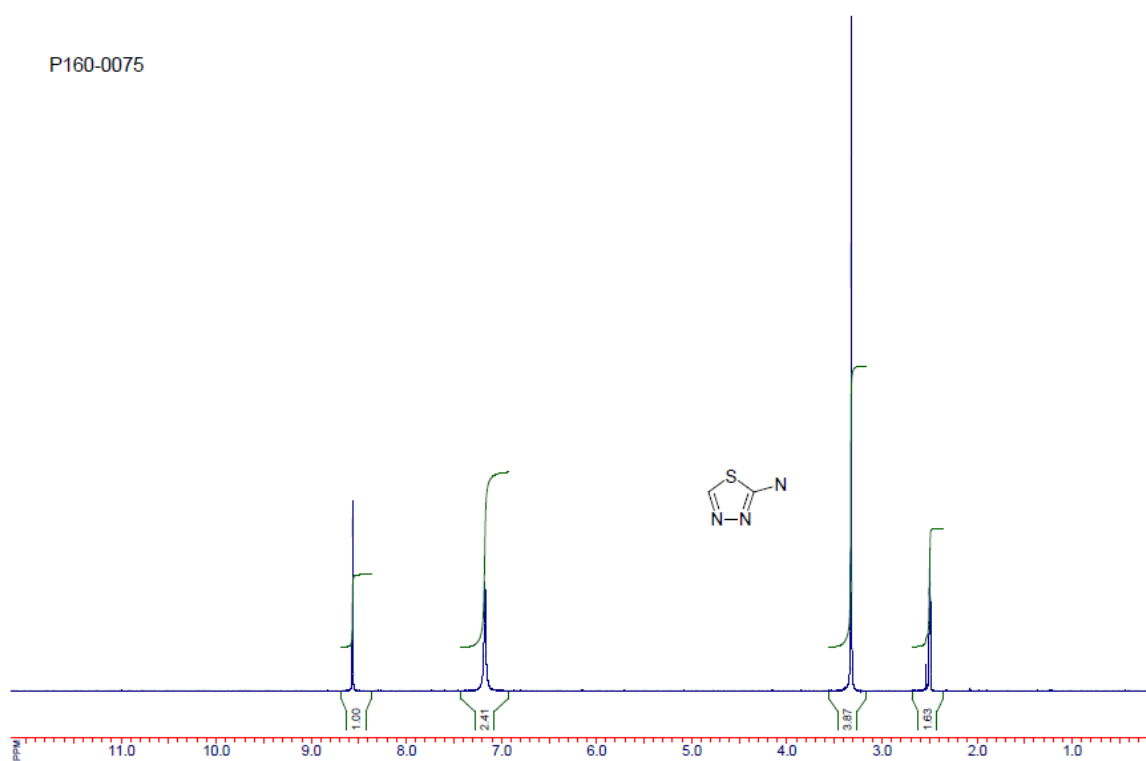



K.

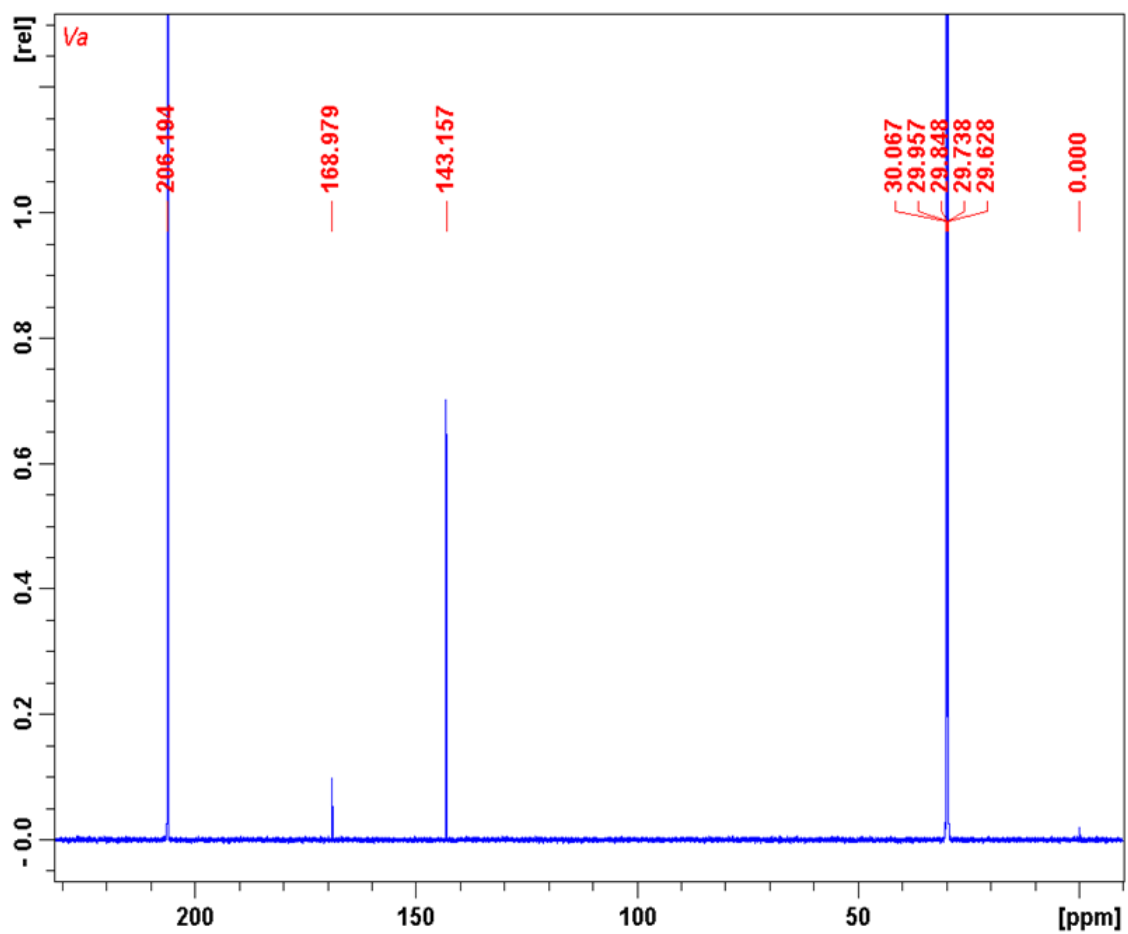

L.

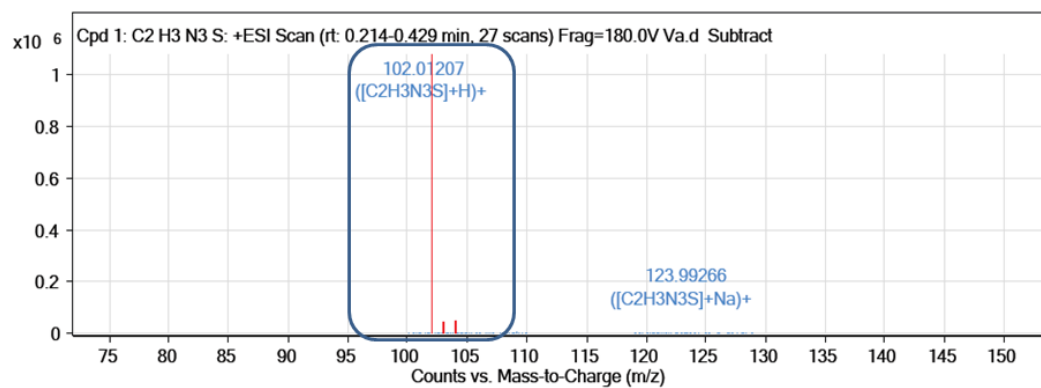

M.

P160-0076

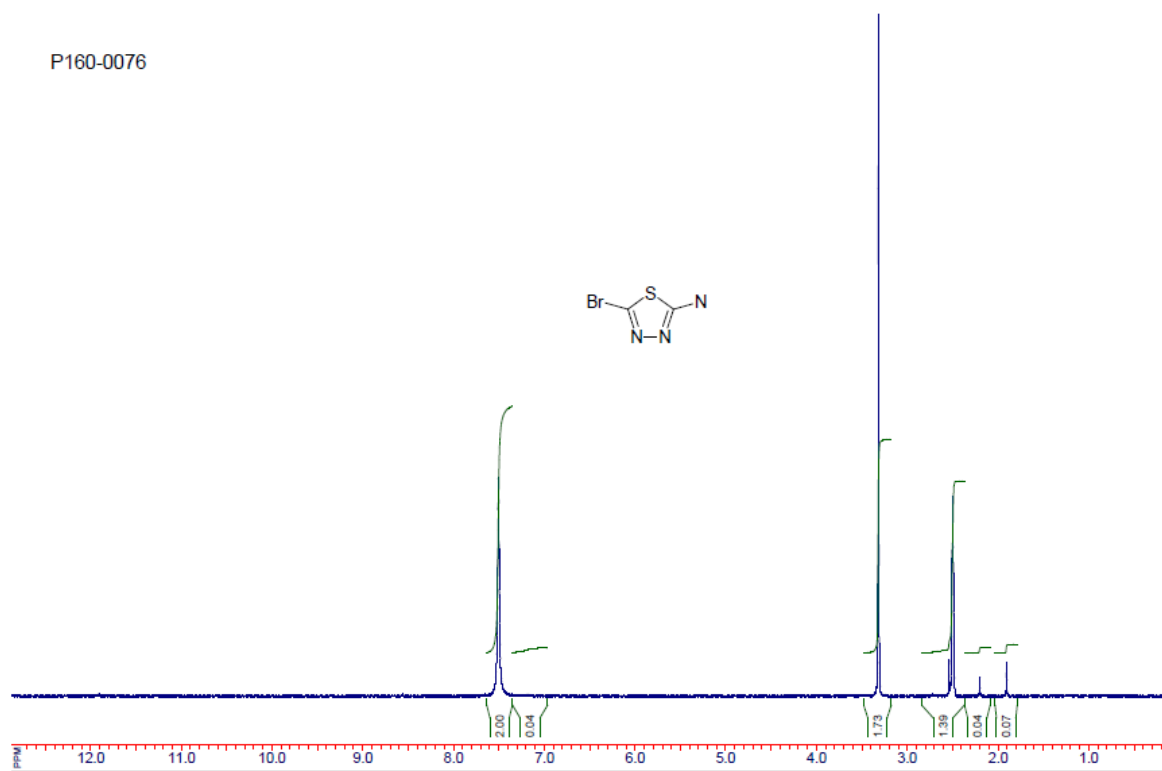

N.

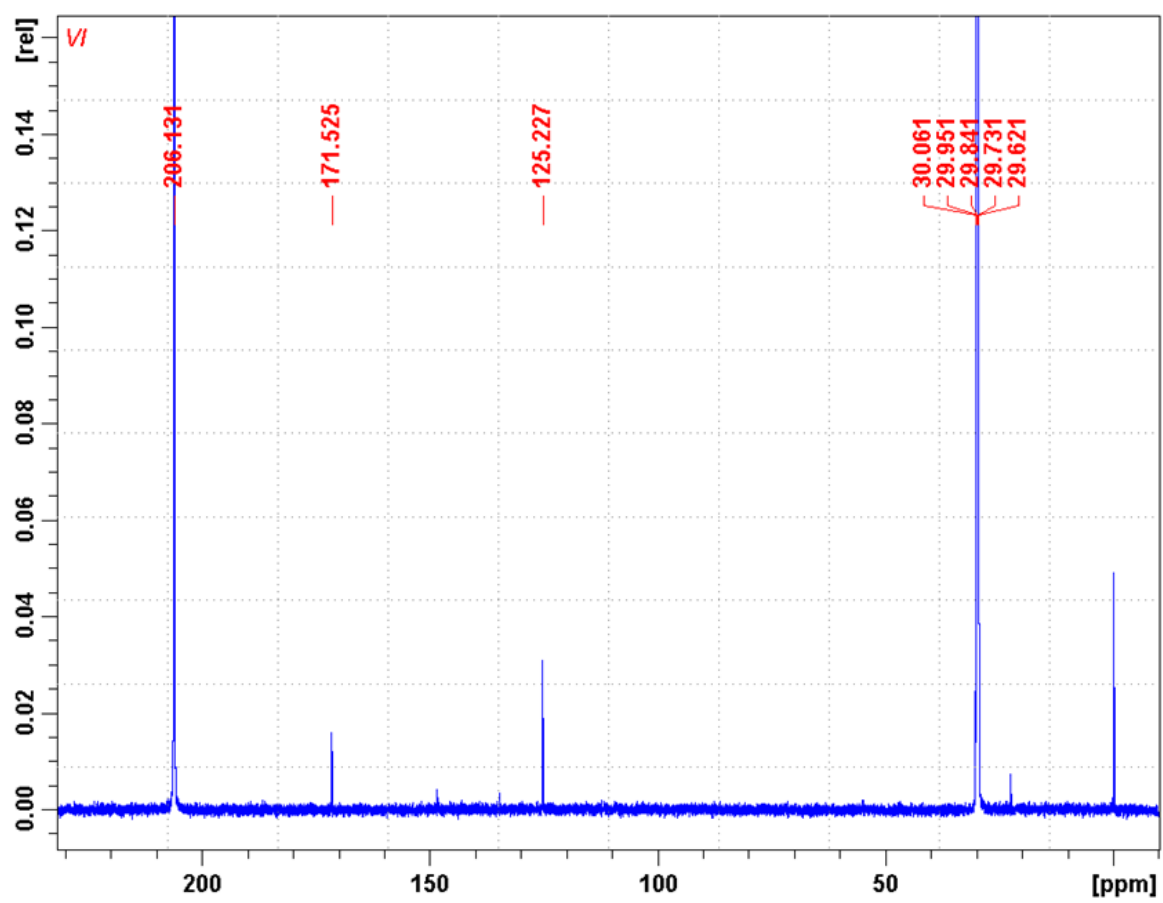

O.

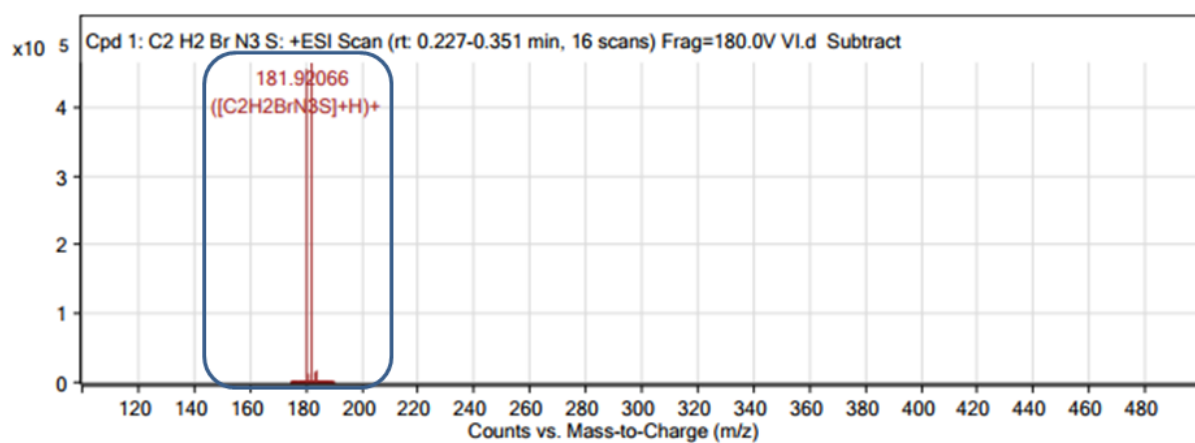

P.

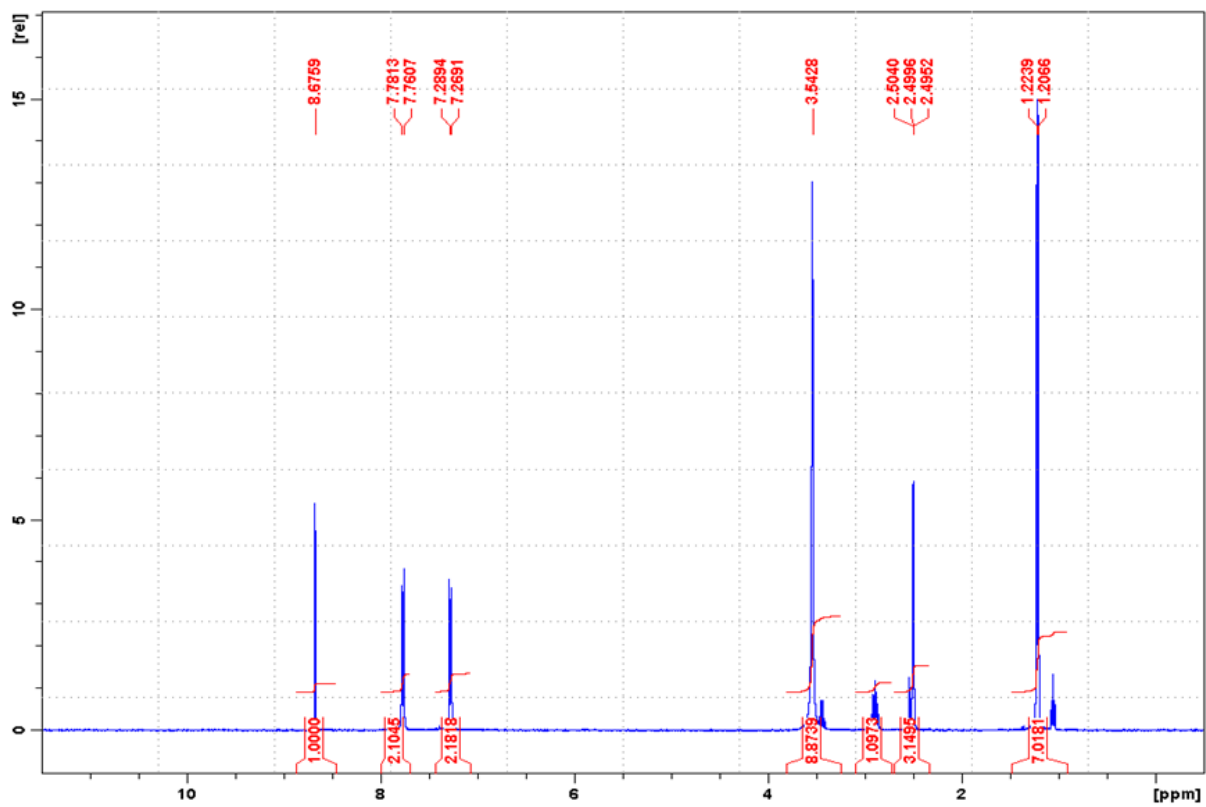

Q.

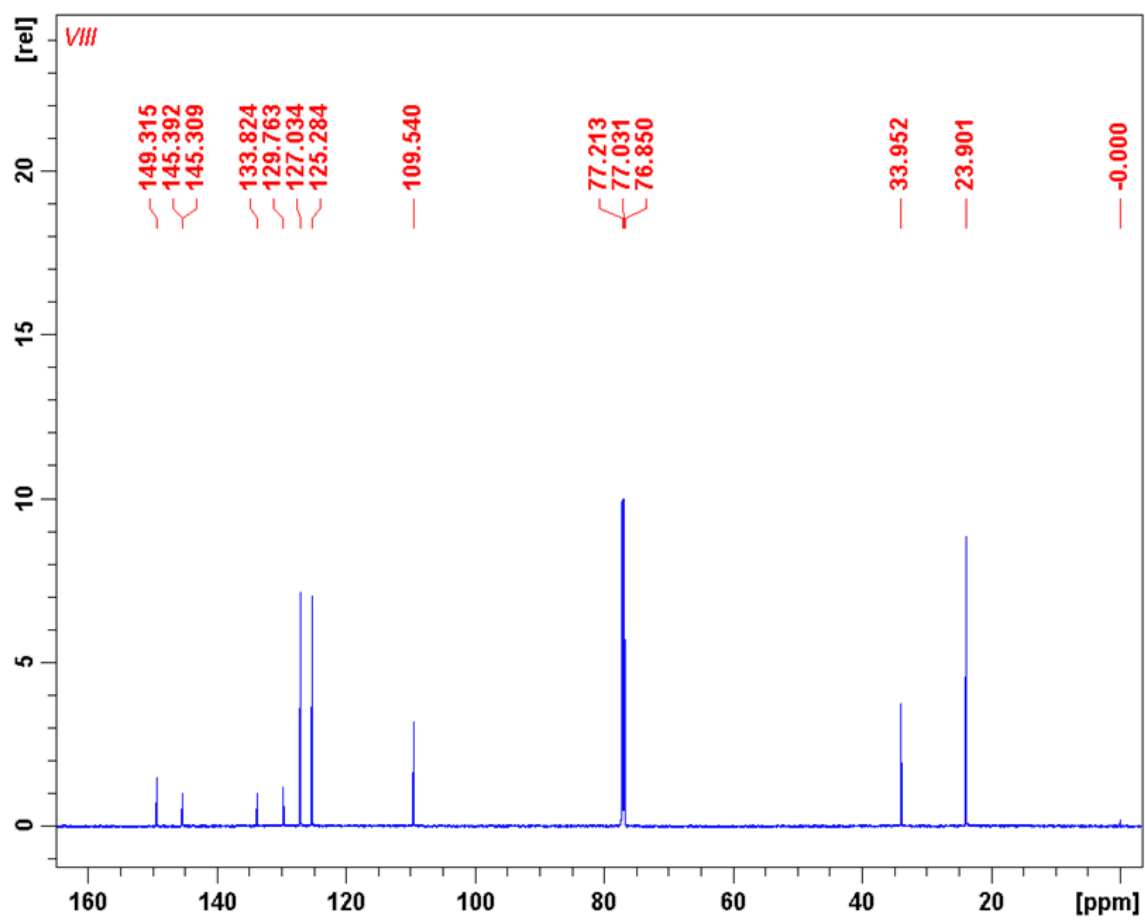

R.

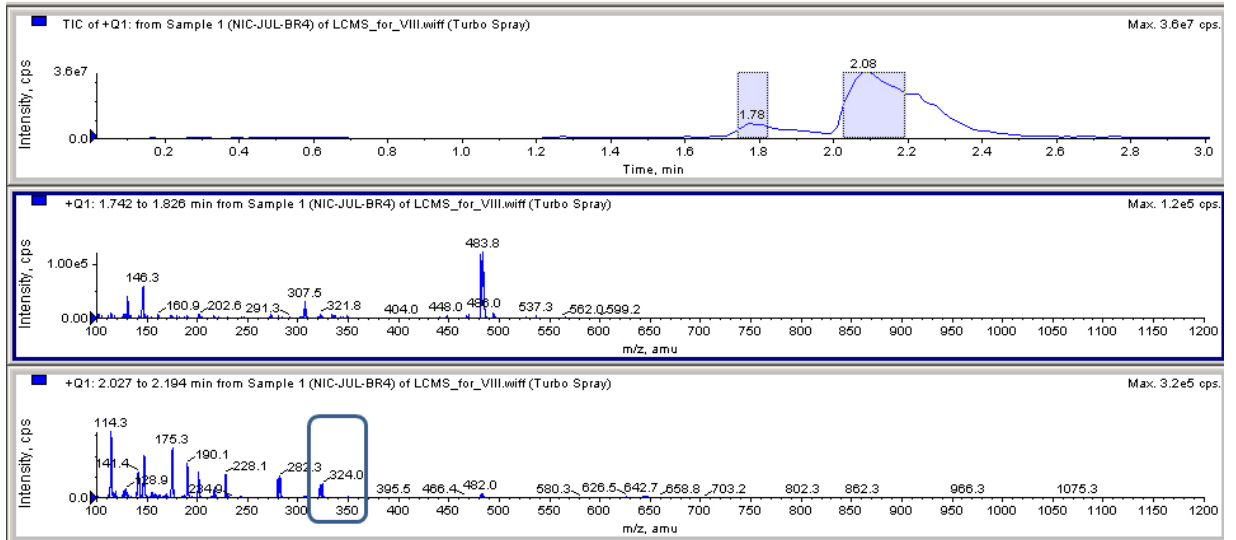

S.

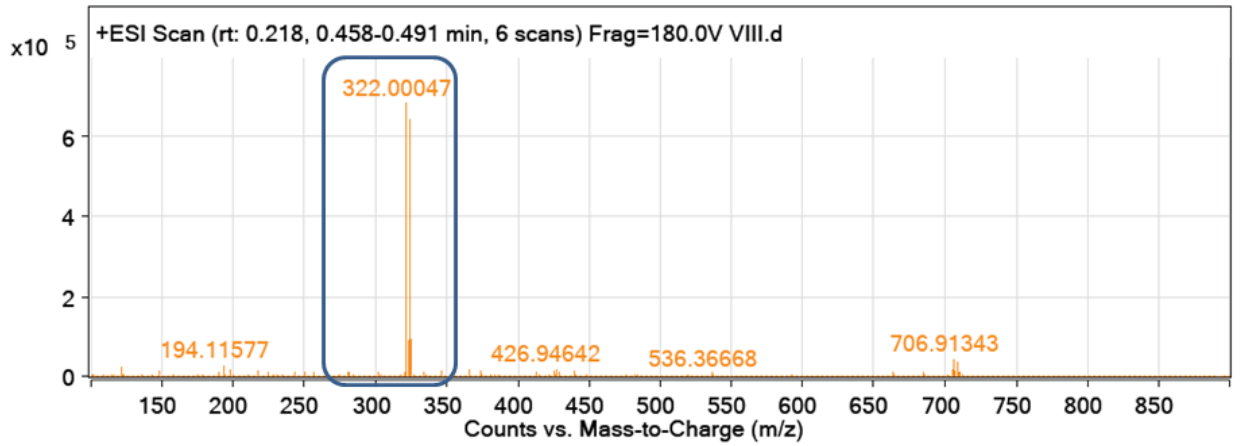



T.

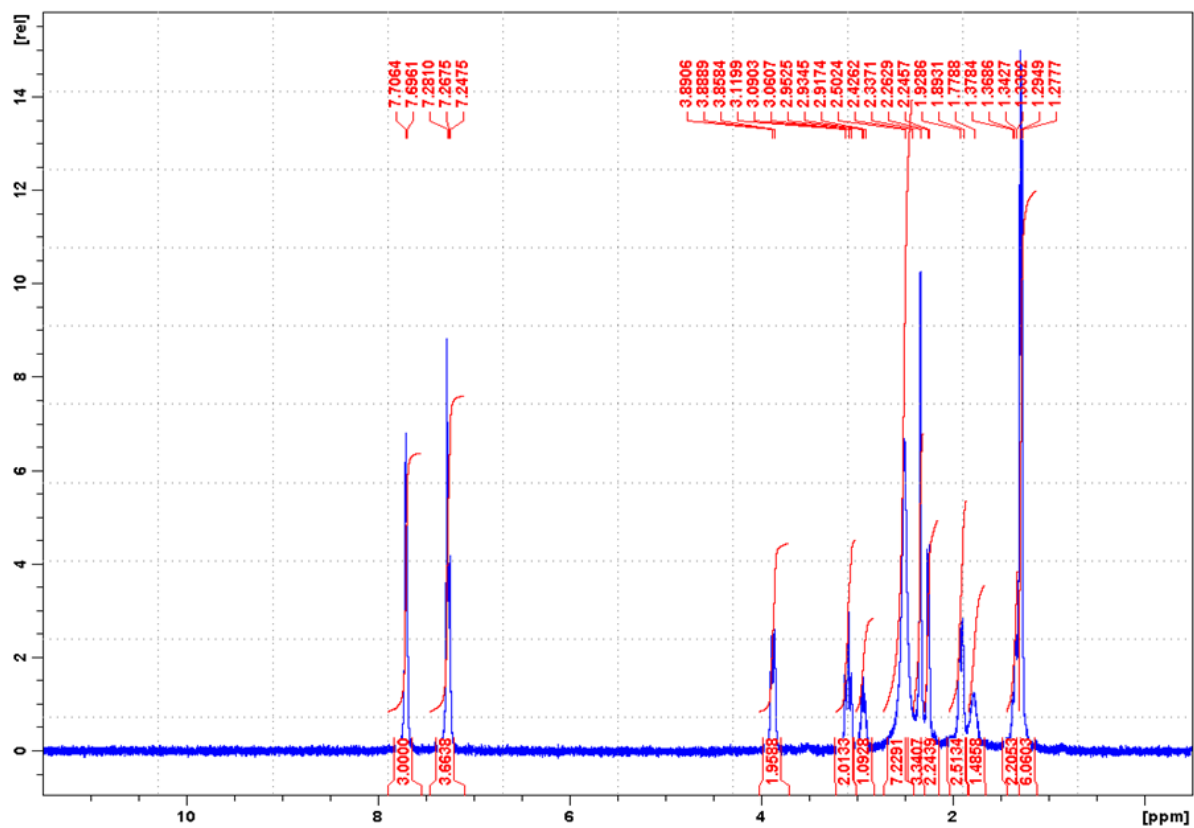

U.

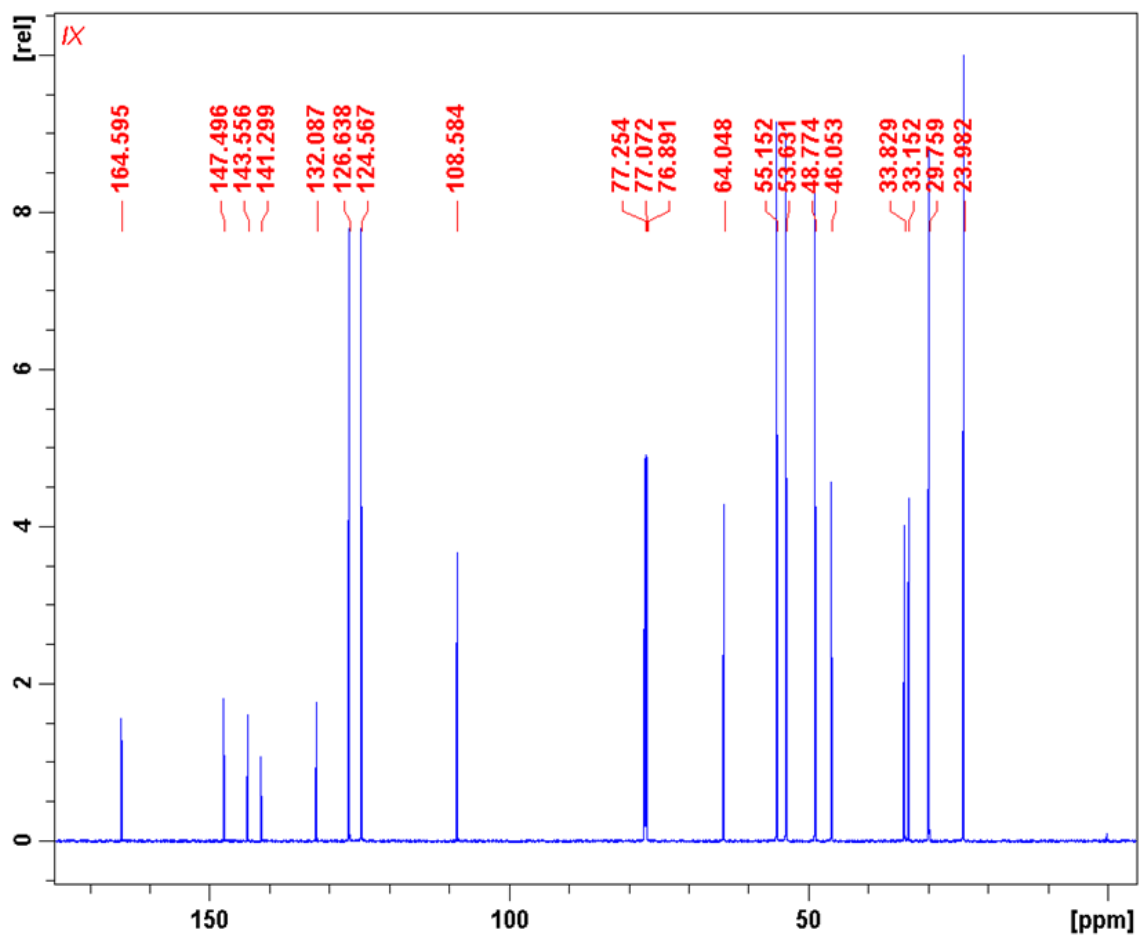

V.

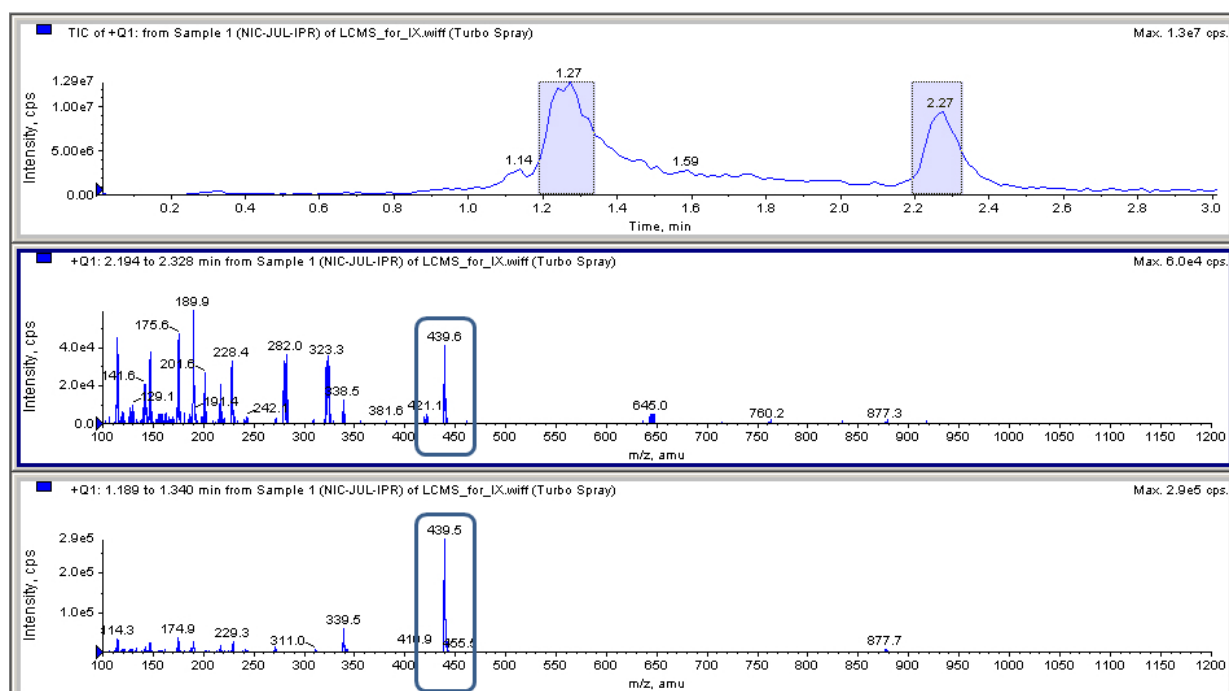

W.

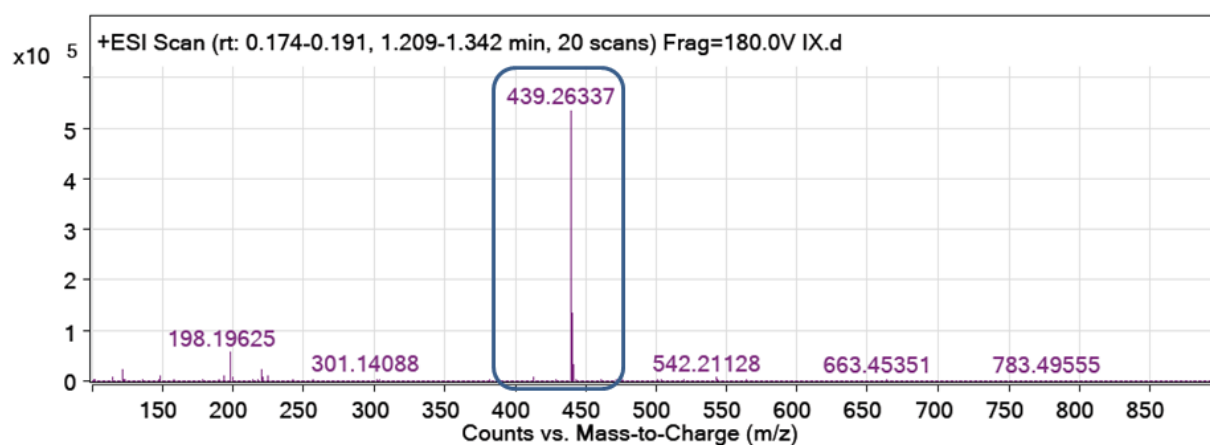

**Supplementary figure 2. Chemical characterizations of E260 –tartrate and its synthesis intermediates.**

(A)  $^1\text{H}$ -NMR of compound II. (B)  $^{13}\text{C}$ -NMR of compound II. (C) HRMS analysis of the compound II confirms a molecular weight of 334.20986 Dalton as calculated (Boxed with blue Square). (D)  $^1\text{H}$ -NMR of compound III. (E)  $^{13}\text{C}$ -NMR of compound

III. **(F)** HRMS analysis of the compound III confirms a molecular weight of 212.17620 Dalton as calculated (Boxed with blue Square) **(G)**  $^1\text{H}$ -NMR of compound IV. **(H)**  $^{13}\text{C}$ -NMR of compound IV. **(I)** HRMS analysis of the compound IV confirms a molecular weight of 198.19630 Dalton as calculated (Boxed with blue Square). **(J)**  $^1\text{H}$ -NMR of compound Va. **(K)**  $^{13}\text{C}$ -NMR of compound Va. **(L)** HRMS analysis of the compound Va confirms a molecular weight of 102.01207 Dalton as calculated (Boxed with blue Square). **(M)**  $^1\text{H}$ -NMR of compound VI. **(N)**  $^{13}\text{C}$ -NMR of compound VI. **(O)** HRMS analysis of the compound VI confirms a molecular weight of 181.92066 Dalton as calculated (Boxed with blue Square). **(P)**  $^1\text{H}$ -NMR of compound VIII . Integral of peaks reflects number of protons **(Q)**  $^{13}\text{C}$ -NMR of compound VIII. **(R)** LCMS analysis of compound VIII with a retention time of 2.08 and molecular weight of 322.2, 324.0 Dalton in 1:1 ratio (Boxed with blue square), due to  $^{79}\text{Br}$ ,  $^{81}\text{Br}$  isotopes. **(S)** HRMS analysis of the compound VIII confirms a molecular weight of 322.00047 Dalton as calculated (Boxed with blue Square). **(T)**  $^1\text{H}$ -NMR of compound IX . Integral of peaks reflects number of protons. **(U)**  $^{13}\text{C}$ -NMR of compound IX. **(V)** LCMS analysis of compound IX with two retention times of 1.27 as the main and 2.27 as an overload which integrated also into the second peak and a molecular weight of 439.5 Dalton (Boxed with blue square). **(W)** HRMS analysis of the compound IX confirms a molecular weight of 439.26337 Dalton as calculated (Boxed with blue Square).

A.

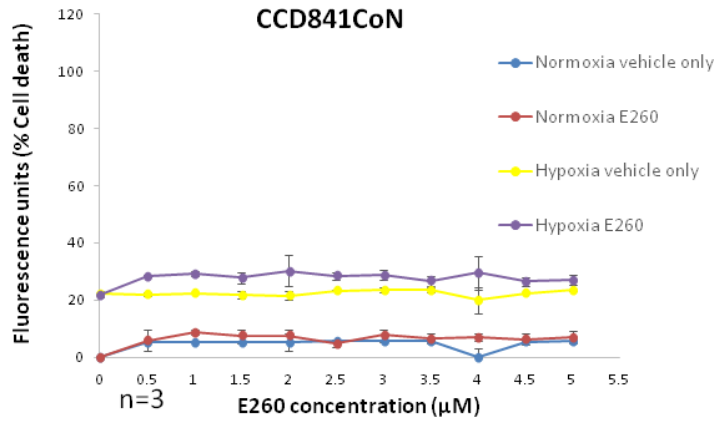

B.

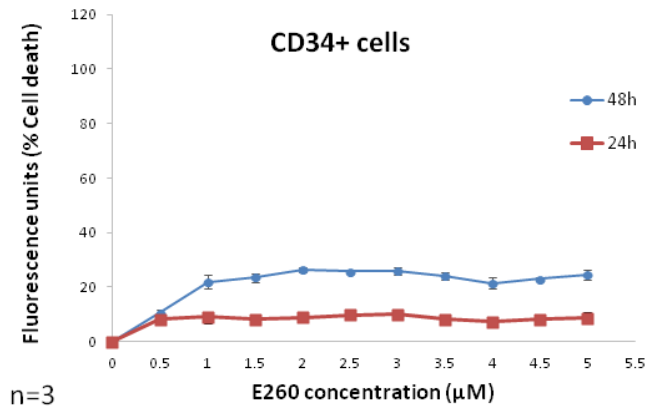

C.

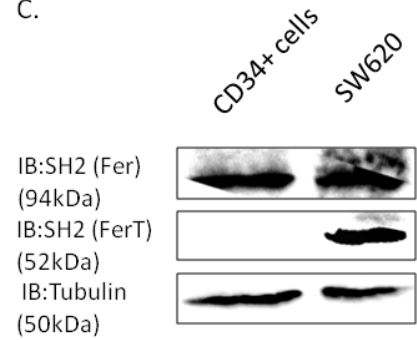

D.

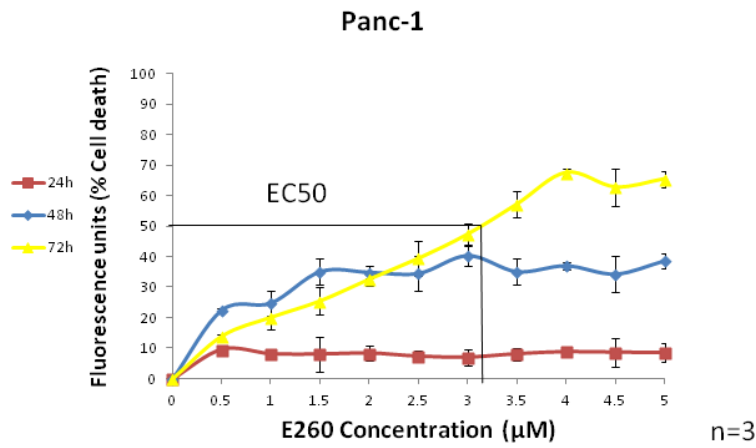

E.

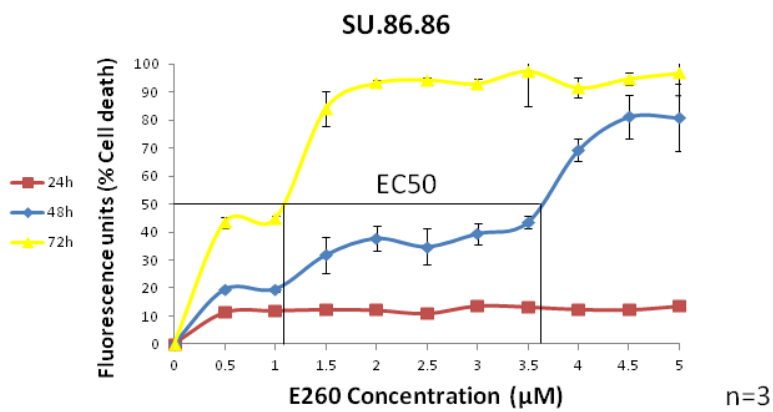

**Supplementary figure 3. Effect of E260 on non-metastatic and metastatic pancreatic cancer cells, normal and hypoxic epithelial cells, and hematopoietic stem cells (CD34+).** (A) Dose response curve depicting the death levels of normal CCD841CoN epithelial cells treated for 24h with either vehicle or ascending concentrations of E260 under normoxic or hypoxic conditions; n=3, +/- SE. (A) Dose response curve depicting the death levels of human donor derived CD34 positive hematopoietic stem cells (CD34+) treated with increasing concentrations of E260 for 24h (Red line) , or 48h (Blue line); n=3, +/- SE. (C) WB analysis of Fer and FerT protein levels in CD34+ and SW620 cells lysate.(D) Dose response curve depicting the death levels of non-metastatic pancreatic cancer cells- PANC-1, treated with increasing concentrations of E260 for 24h (Red line) ,48 h (Blue line) or 72h (Yellow line); n=3, +/- SE. (E) Dose response curve depicting the death levels of metastatic pancreatic cancer cells -SU.86.86, treated with increasing concentrations of E260 for 24h (Red line) ,48 h (Blue line) or 72h (Yellow line) ; n=3, +/- SE.

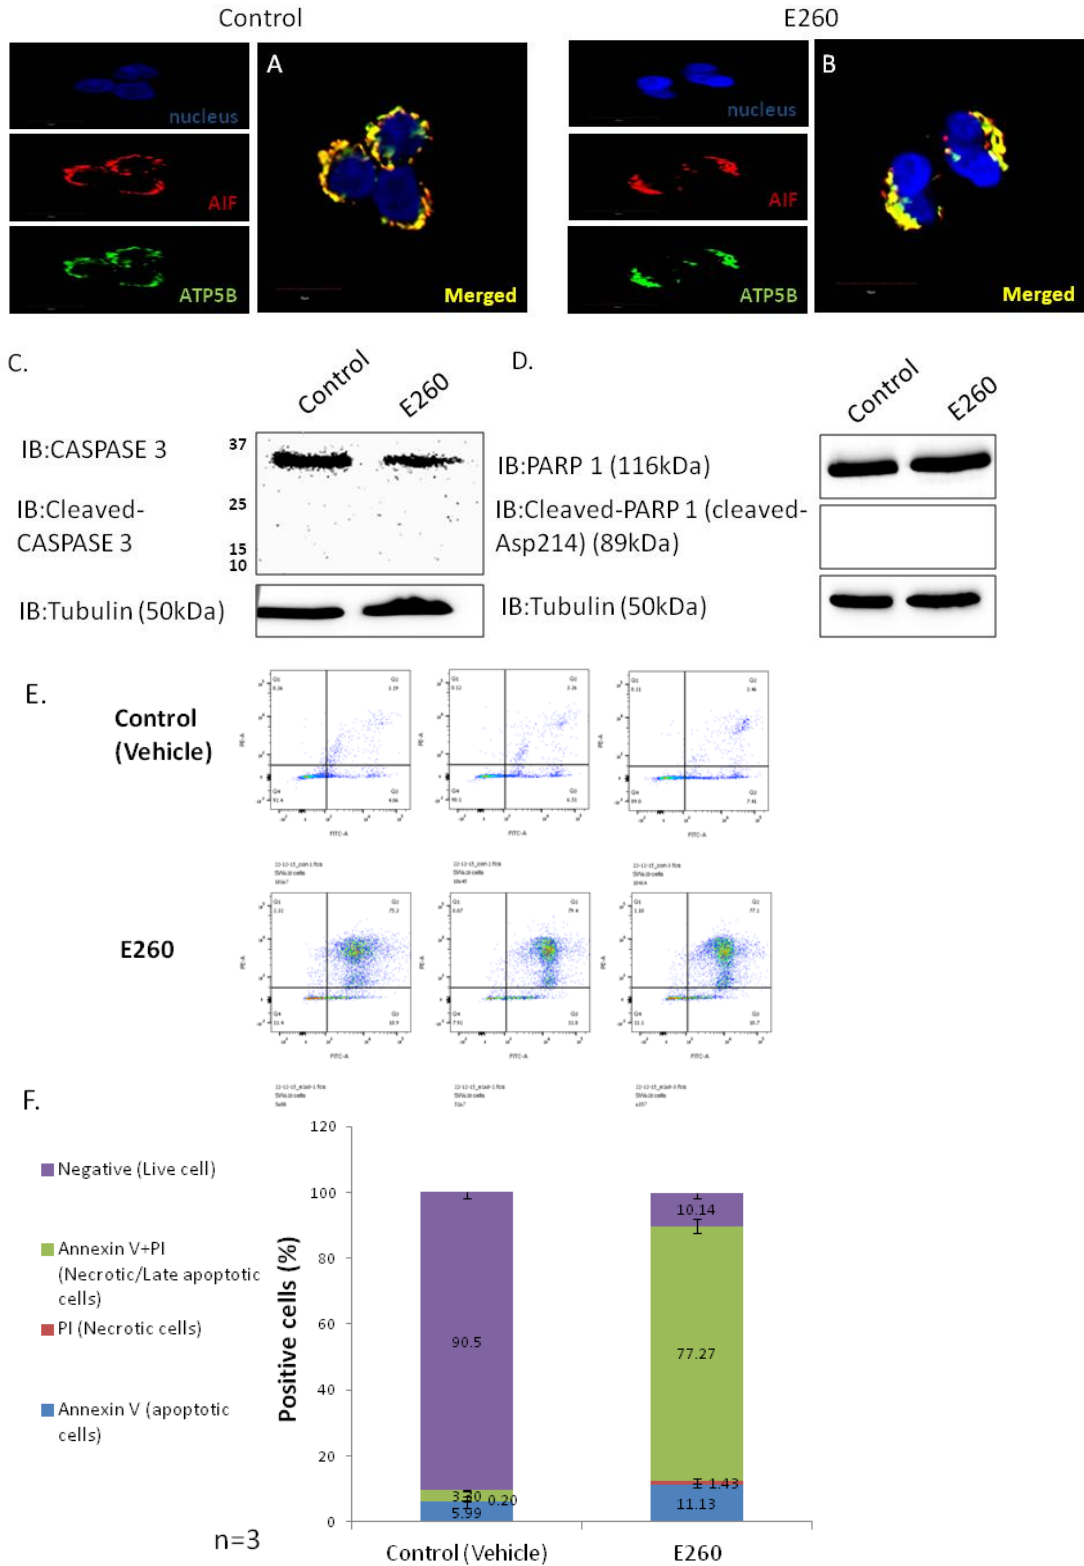

**Supplementary figure 4. E260 evokes necroptosis and not apoptosis in treated CC cells. (A and B)** Staining for AIF (Red) and ATP5B (Green) in SW620 cells treated with control vehicle (A) or E260 (B) for 16h. Separate channels are presented

on the left of each merged image. Yellow color represents co-localization. Bars represent 10  $\mu\text{m}$ . Nuclei were visualized with Hoechst (Blue). (C) Protein lysates from SW620 cells treated with control vehicle or 2 $\mu\text{M}$  E260 for 16h, were subjected to WB analysis using anti-Caspase 3 and anti-tubulin antibodies. (D) Protein lysates from control or 2 $\mu\text{M}$  E260 treated SW620 cells were subjected to WB analysis using anti-PARP-1 and anti-tubulin antibodies. (E-F) FACS analysis of Annexin V-PI staining in cells treated with control solution (vehicle) or 2  $\mu\text{M}$  E260 for 16h.



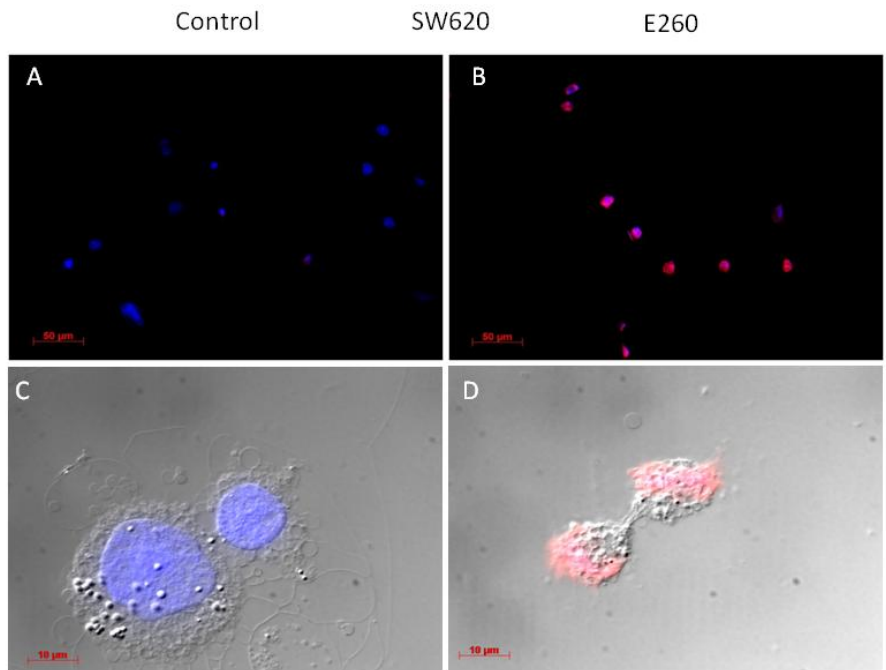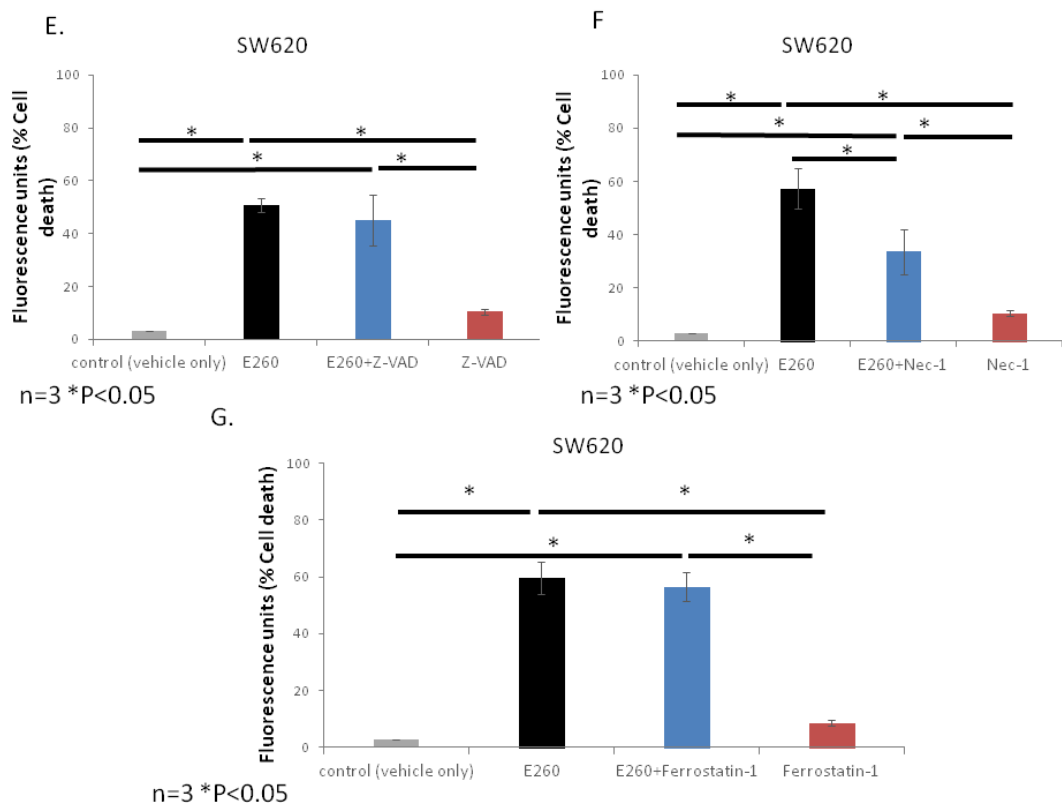

**Supplementary figure 5. Apoptosis inhibitors does not affect E260 cytotoxicity in treated SW620 cells**

**(A-D)** SW620 cells treated with vehicle (**A** and **C**), or E260 (**B** and **D**) for 16h, were subjected to EthIII dye (Red) and Hoechst (Blue) uptake assay and visualized under confocal fluorescence microscope to detect necrotic cells. Bars represent 50 $\mu$ m in **A** and **B**, and 10 $\mu$ m in **C** and **D**. **(E)** Cell death levels in SW620 cells treated for 16h with vehicle (Grey), 2 $\mu$ M E260 (Black), 2 $\mu$ M E260 and 50 $\mu$ M Z-VAD (Blue), or 50 $\mu$ M Z-VAD alone (Red); n=3, +/-SE. **(F)** Cell death levels in SW620 cells treated for 16h with vehicle (Grey), 2 $\mu$ M E260 (Black), 2 $\mu$ M E260 and 100 $\mu$ M Nec-1 (Blue), or 100 $\mu$ M Nec-1 alone (Red); n=3, +/-SE. **(G)** Cell death levels in SW620 cells treated for 16h with vehicle (Grey), 2 $\mu$ M E260 (Black), 2 $\mu$ M E260 and 1 $\mu$ M Ferrostatin-1 (Blue), or 1 $\mu$ M Ferrostatin-1 alone (Red); n=3, +/-SE.

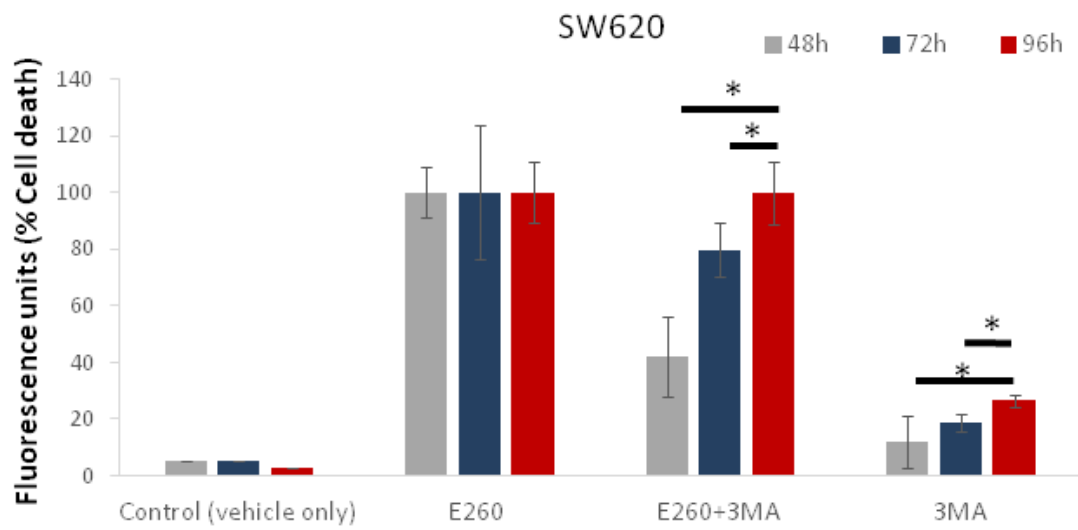

n=3 \*P<0.05

**Supplementary figure 6. 3-MA attenuates the cytotoxic effects of E260.** Cell death levels in SW620 cells treated for different periods of time with vehicle, 2 $\mu$ M E260, 2 $\mu$ M E260 and 5mM 3-MA, or 5mM 3-MA alone; n=3, +/-SE.

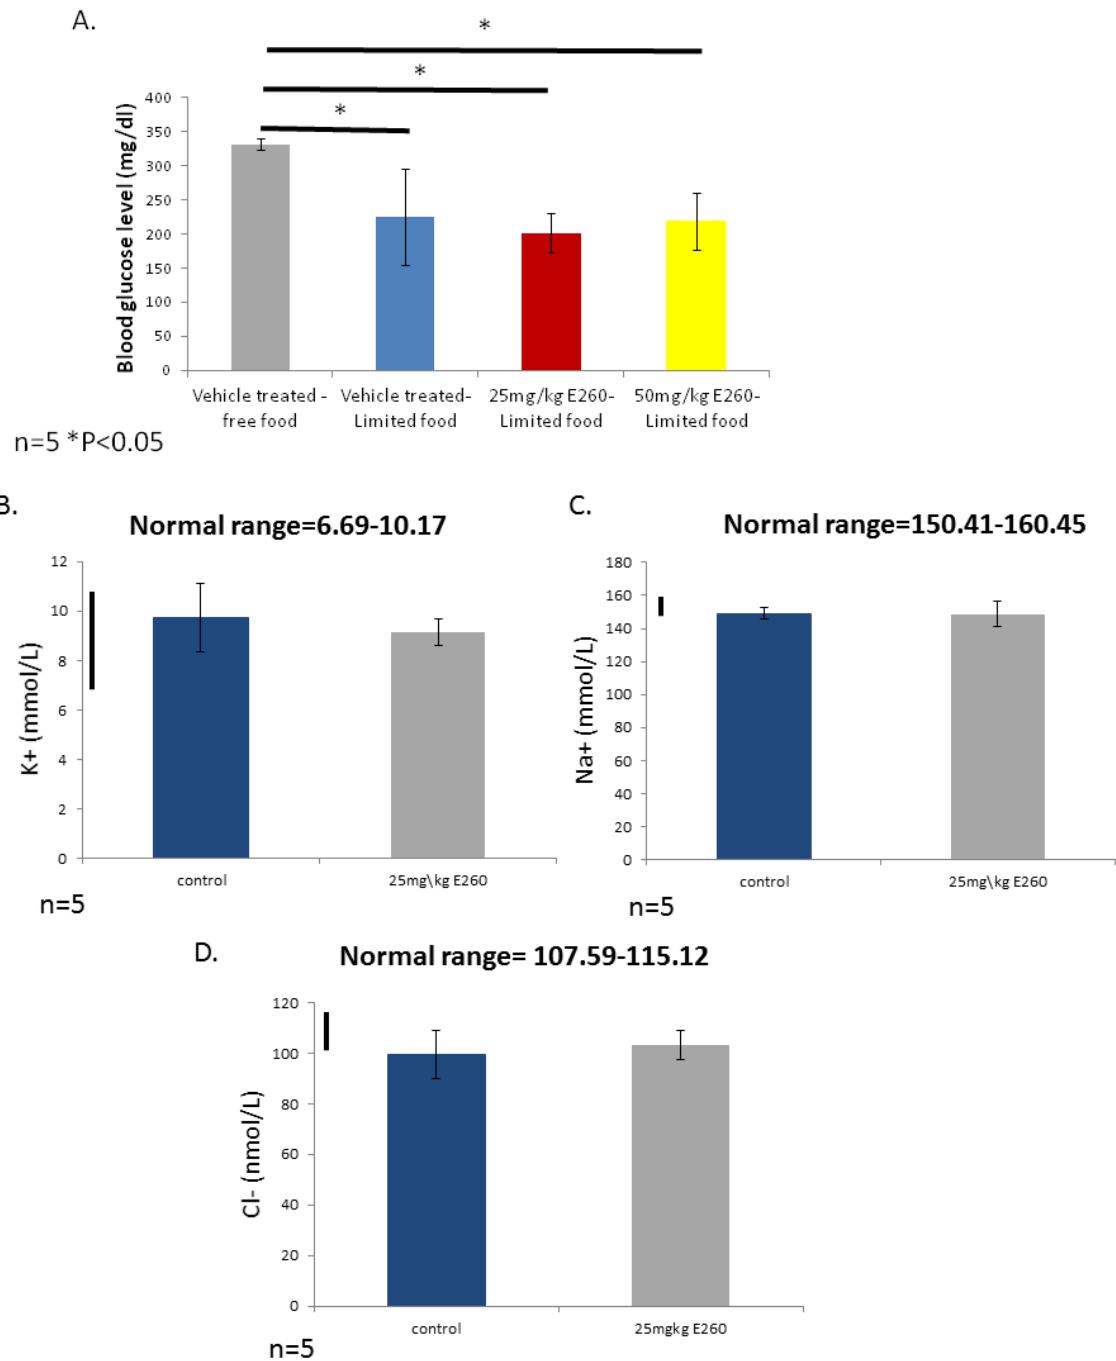

**Supplementary figure 7. Blood Glucose and electrolyte levels of E260 treated mice.** (A) Serum Glucose levels in mice treated with control vehicle and given *ad-libitum* food access (Grey), treated with control vehicle and given limited food access (Blue), treated with 25mg/kg E260 and given limited food access (Red) and treated

with 50mg/kg E260 and given limited food access (Yellow). **(B-D)** Blood electrolyte levels in serum of control (Blue) and 25mg/kg E260 treated (Grey) mice; n=5, +/-SD.

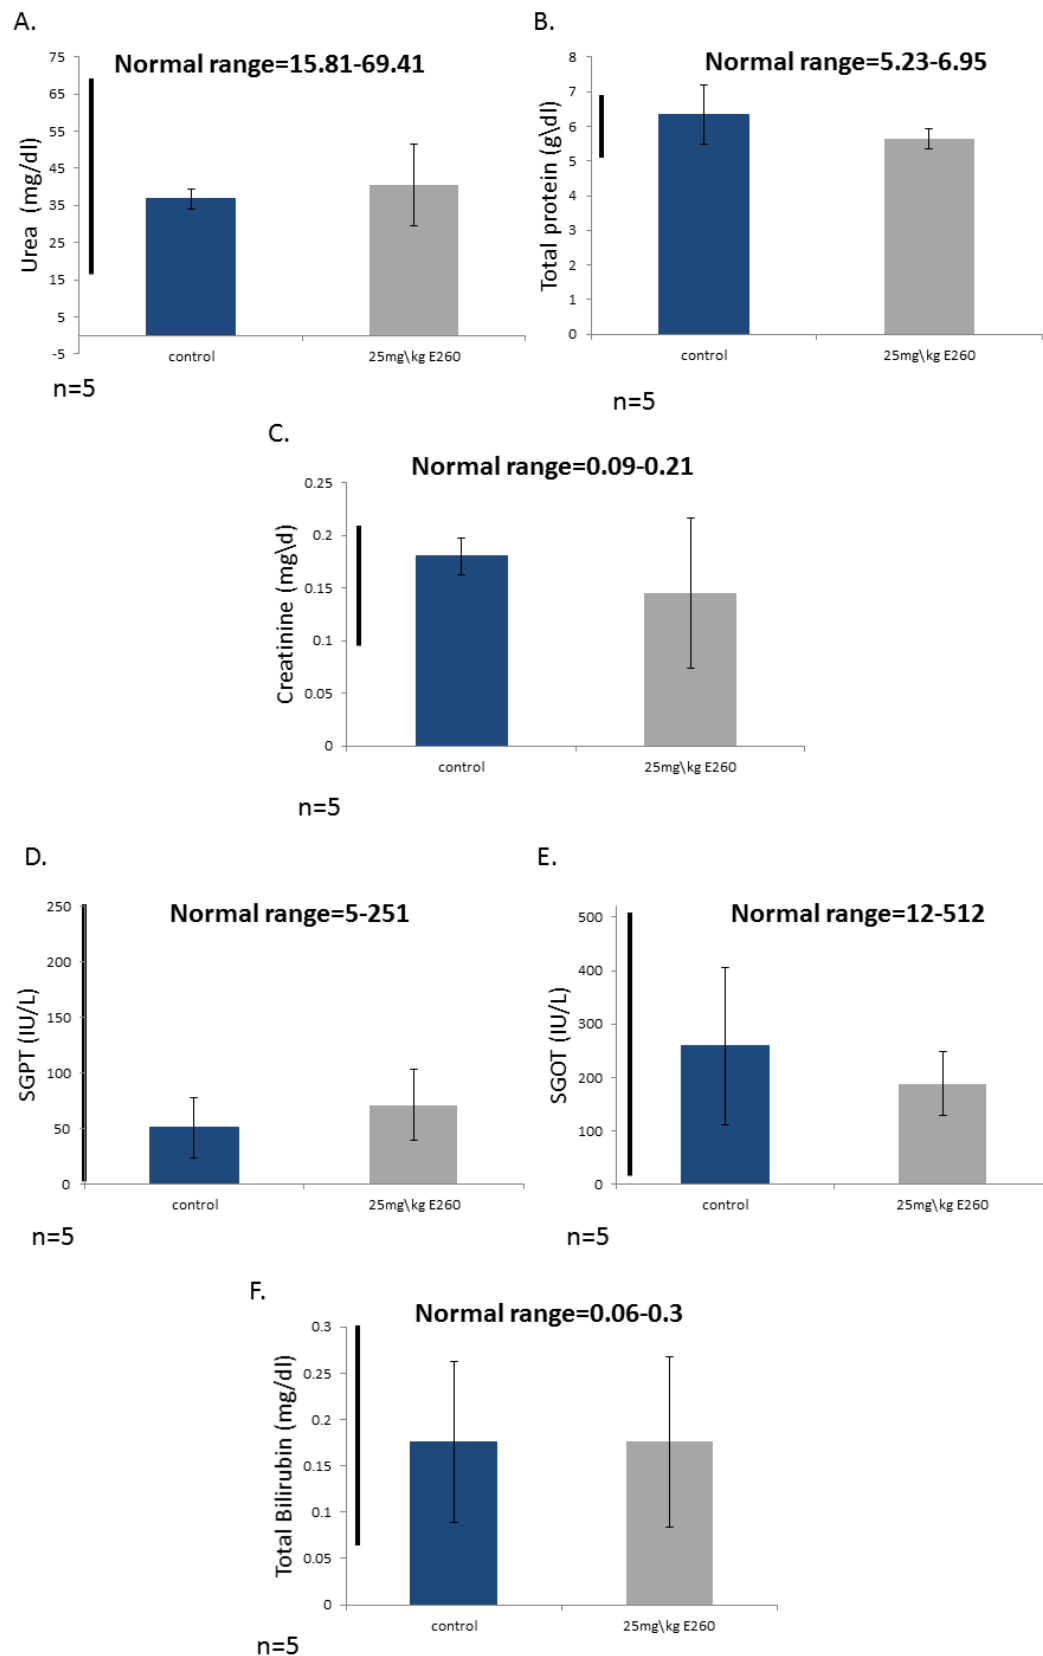

**Supplementary figure 8. Blood Kidney and liver function markers levels of E260 treated mice. (A-C) Serum levels of kidney function markers in control (Blue) and**

25mg/kg E260 treated (Grey) mice; n=5, +/-SD. **(D-G)** Serum levels of liver enzymes in serum of control (Blue) and 25mg/kg E260 (Grey) treated mice; n=5, +/-SD.

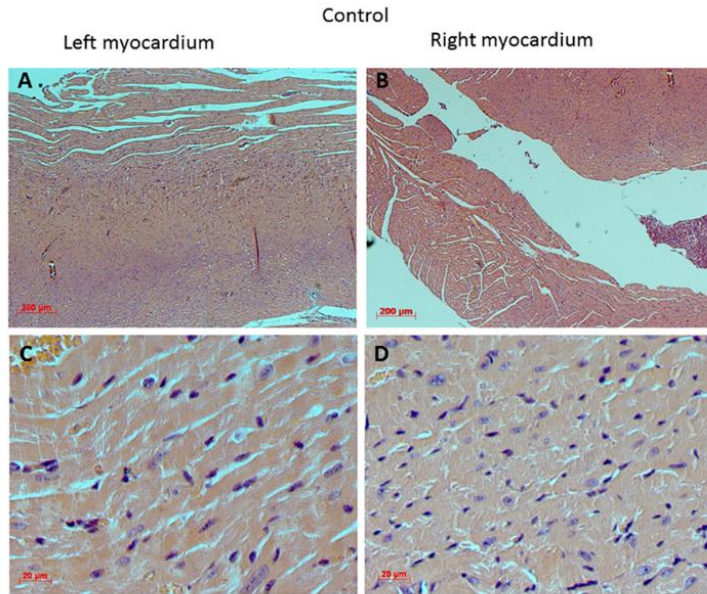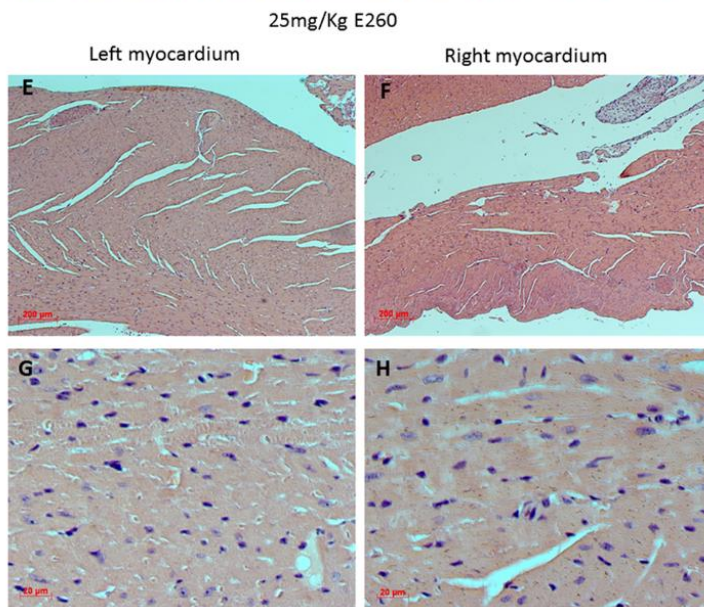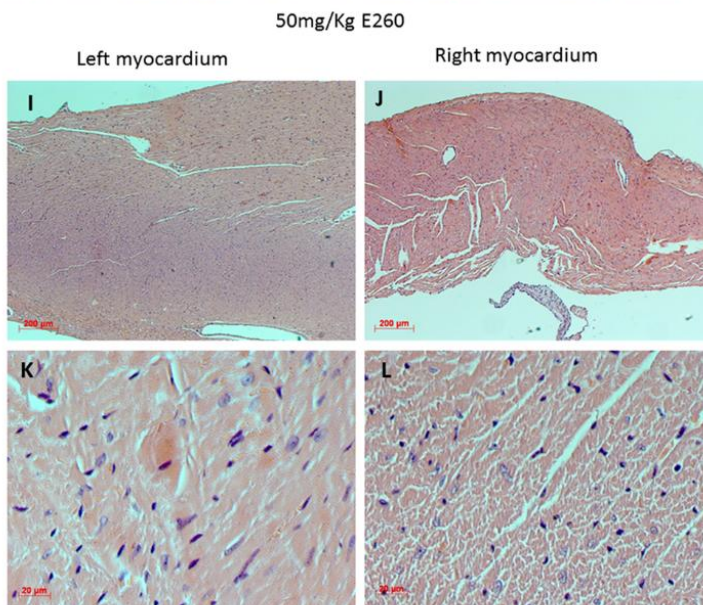



**Supplementary figure 9. Histopathological analysis of hearts from E260 treated mice.** Hearts from control (**A-D**), 25mg/kg E260 (**E-H**), and 50mg/kg E260 (**I-L**) treated mice were fixed, embedded in paraffin, and stained with H&E for histopathological analysis. Five mice were examined from each group, and representative images are shown.

cortex control medulla

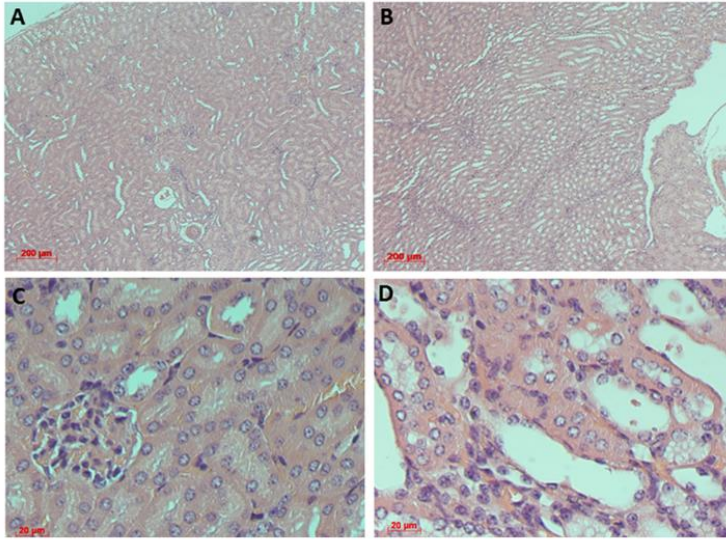

25mg/Kg E260

cortex medulla

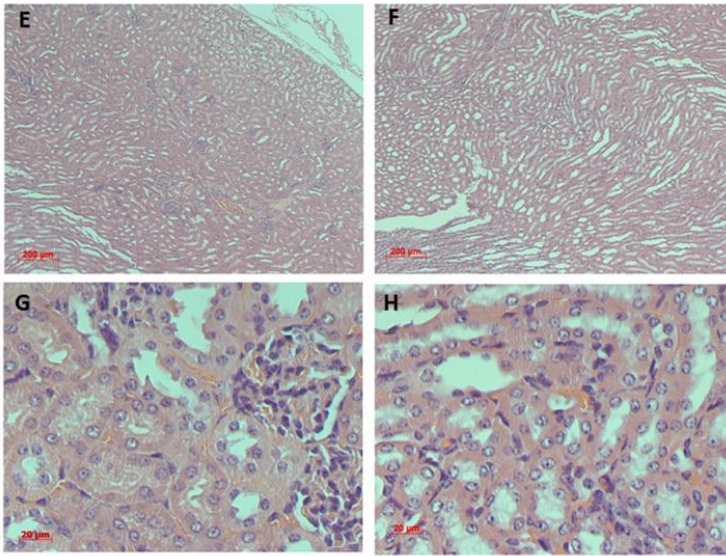

50mg/Kg E260

cortex medulla

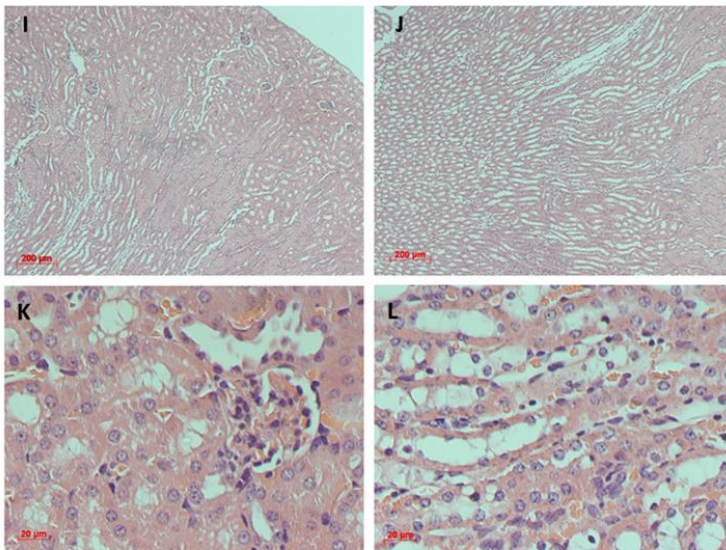

**Supplementary figure 10. Histopathological analysis of kidneys from E260 treated mice.** Kidneys from control (**A-D**), 25mg/kg E260 (**E-H**), and 50mg/kg E260 (**I-L**) treated mice were fixed, embedded in paraffin, and stained with H&E for histopathological analysis. Five mice were examined from each group, and representative images are shown.



Control

Periphery

Center

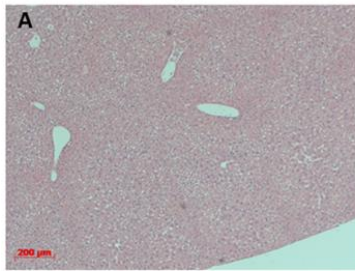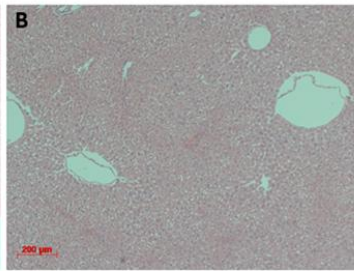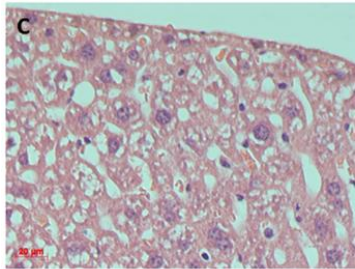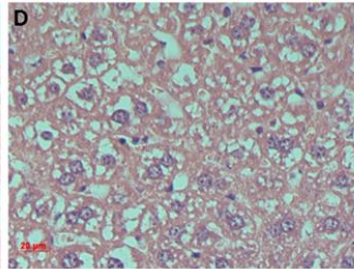

25mg/Kg E260

Periphery

Center

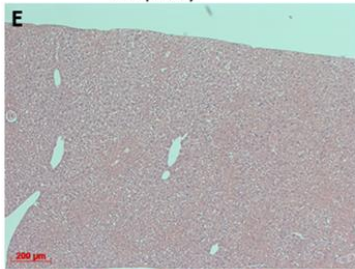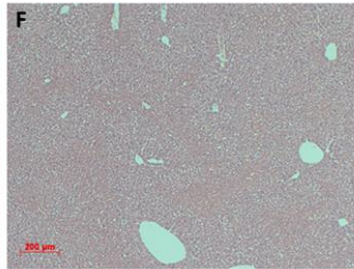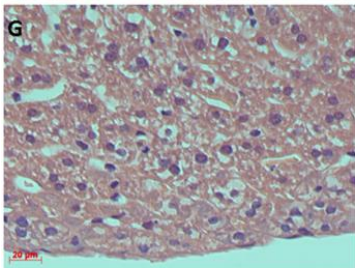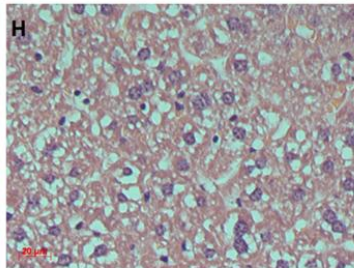

50mg/Kg E260

Periphery

Center

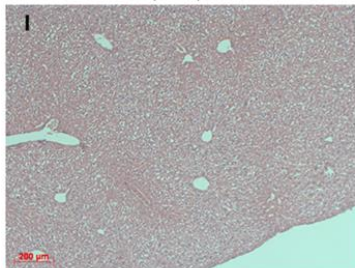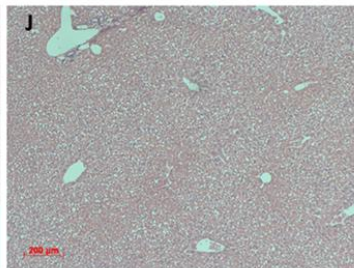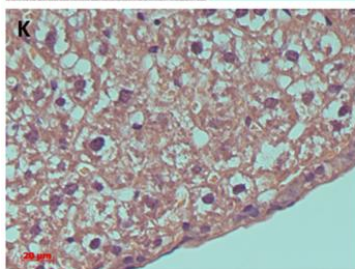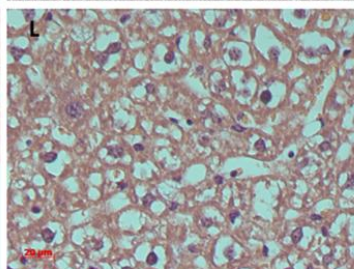

**Supplementary figure 11. Histopathological analysis of livers from E260 treated mice.** Livers from control (**A-D**), 25mg/kg E260 (**E-H**), and 50mg/kg E260 (**I-L**) treated mice were fixed, embedded in paraffin, and stained with H&E for histopathological analysis. Five mice were examined from each group, and representative images are shown.

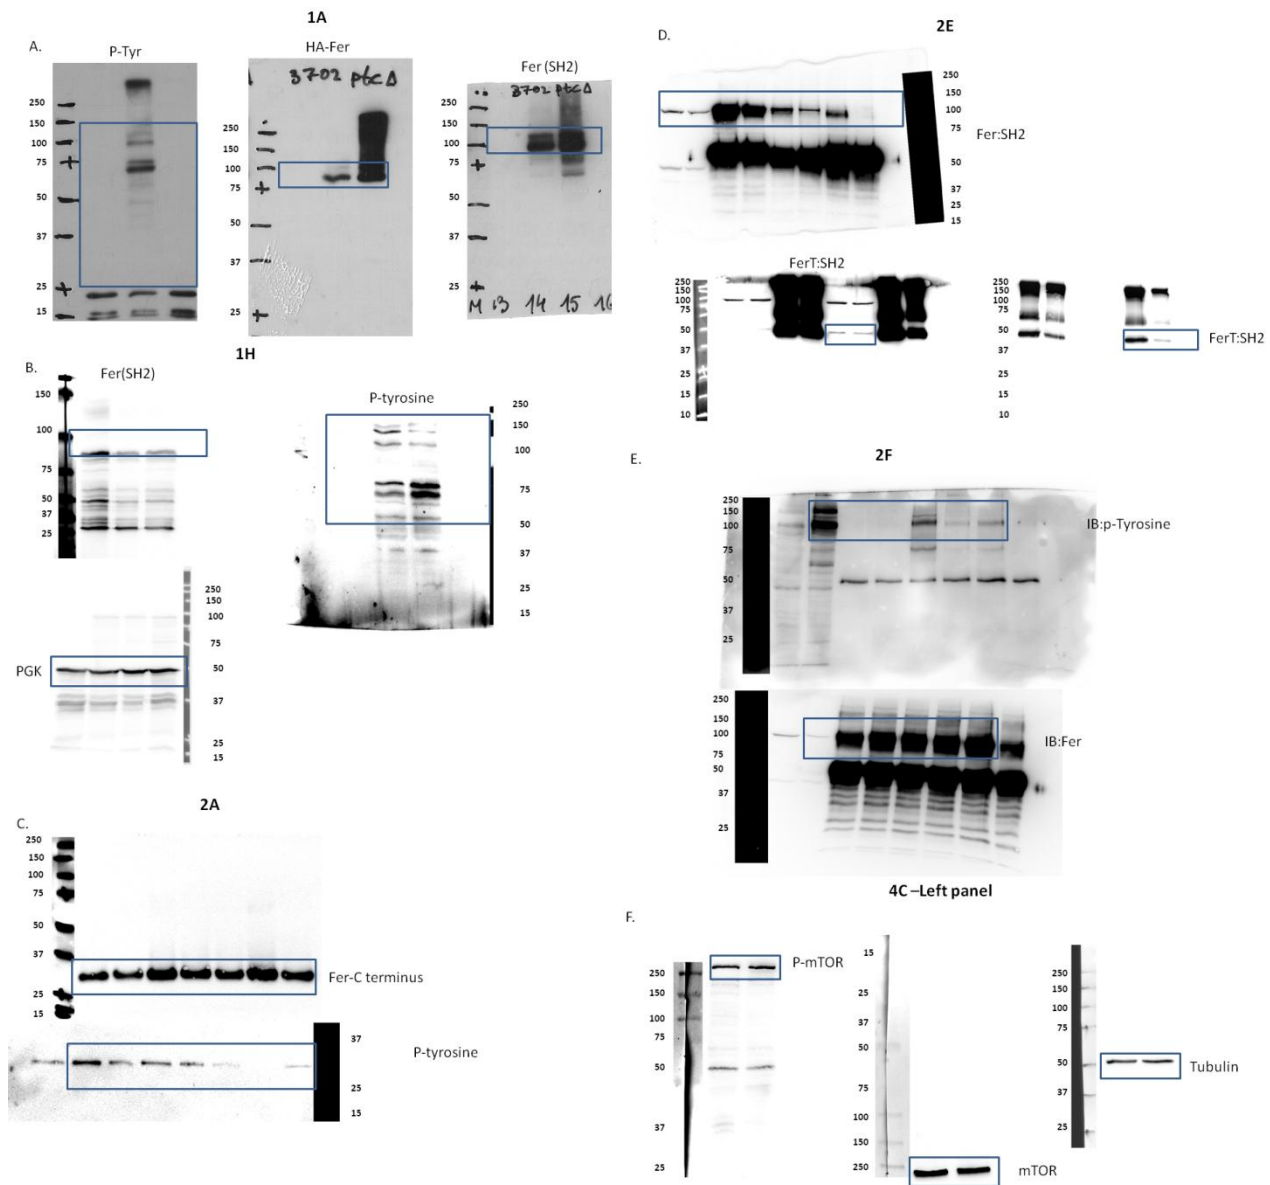

**Supplementary figure 12. Uncropped full blots which appear in this manuscript.**

Cropped areas are boxed and labeled with the correlating protein. Figure number appears at the head of each blots panel. (A) Figure 1A. (B) Figure 1H. (C) Figure 2A. (D) Figure 2E. (E) Figure 2F. (F) Figure 4C- Left panel. Size markers (in kDa) are presented near each blot.

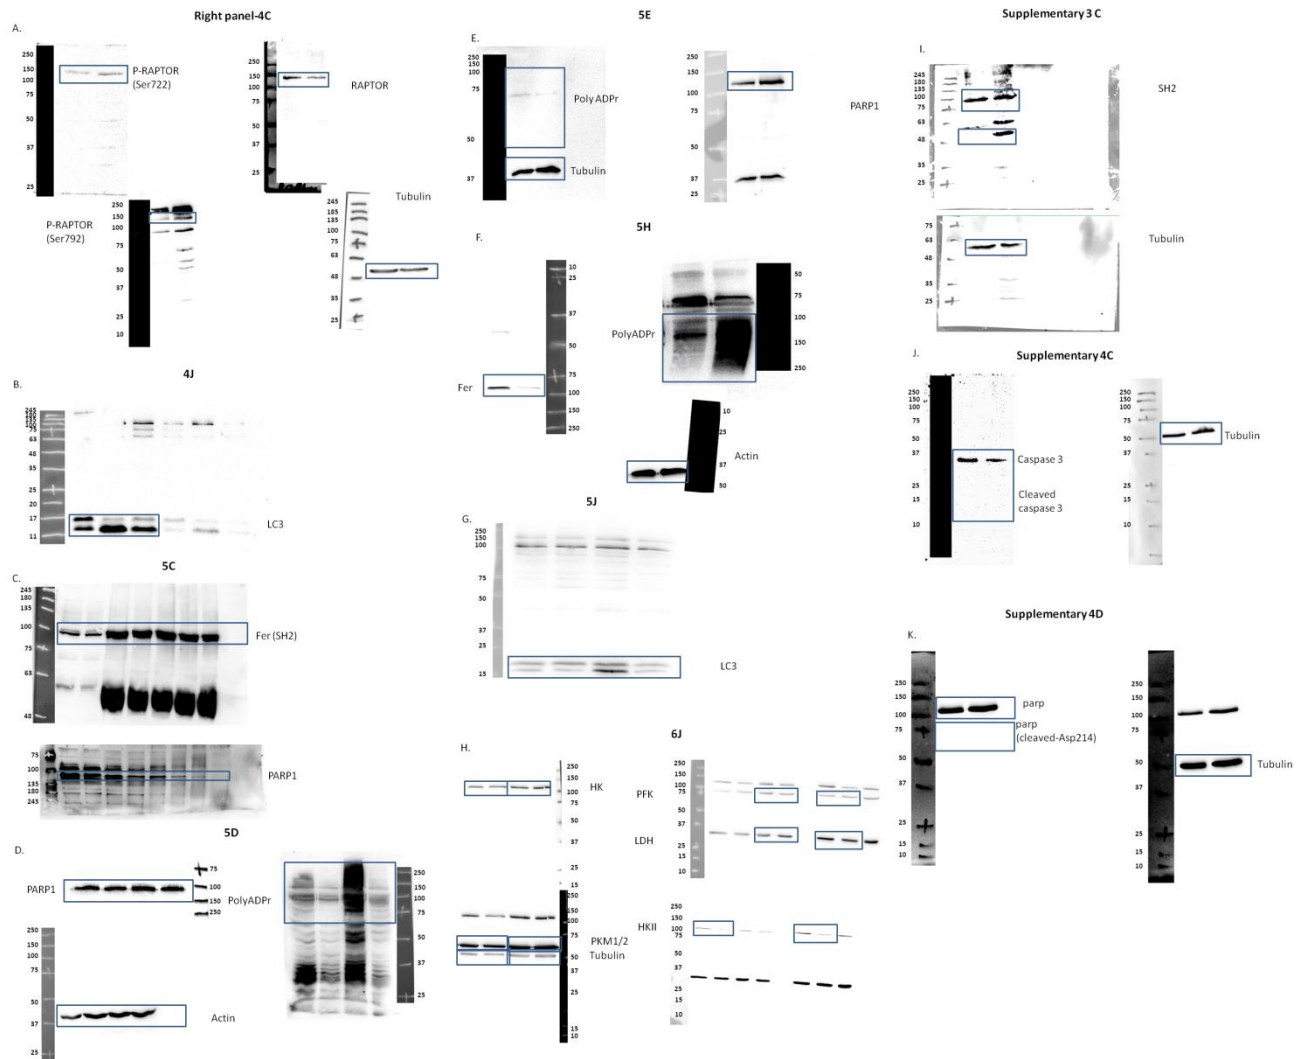

**Supplementary figure 13. Uncropped full blots which appear in this manuscript.**

(A) Figure 4C- Right panel. (B) Figure 4J. (C) Figure 5C. (D) Figure 5D. (E) Figure 5E. (F) Figure 5H. (G) Figure 5J. (H) Figure 6J. (I) Supplementary figure 3C. (J) Supplementary figure 4C. (K) Supplementary figure 4D. Size markers (in kDa) are presented near each blot.
